# Supplementary material
Source: PubMed Central journal article supplement (PMC3797521)
Supplement: cr300015c_si_001.pdf [file cr300015c_si_001.pdf]

# Supporting Information

## (10.1021/cr300015c. *Chem. Rev.*)

|                                                                                                      |          |
|------------------------------------------------------------------------------------------------------|----------|
| <b>Table S1.</b> Chemical structures of arsenicals                                                   | page S2  |
| <b>Table S2.</b> Chemical structures of small thiols                                                 | page S7  |
| <b>Table S3.</b> Binding affinity between arsenicals and proteins                                    | page S8  |
| <b>Table S4.</b> Binding affinity between arsenicals and peptides/small thiols                       | Page S35 |
| <b>Table S5.</b> Rate constants of the binding between arsenicals and proteins/peptides/small thiols | page S43 |

## Arsenic Binding to Proteins

Shengwen Shen <sup>†</sup>, Xing-Fang Li <sup>†</sup>, William R. Cullen <sup>‡</sup>, Michael Weinfeld <sup>§</sup>, X. Chris Le <sup>†\*</sup>

<sup>†</sup> Department of Laboratory Medicine and Pathology, 10-102 Clinical Sciences Building,  
University of Alberta, Edmonton, Alberta, Canada, T6G 2G3

<sup>‡</sup> Department of Chemistry, University of British Columbia, 2036 Main Mall, Vancouver,  
British Columbia, Canada, V6T 1Z1

<sup>§</sup> Department of Oncology, University of Alberta, Cross Cancer Institute, 11560  
University Avenue, Edmonton, Alberta, Canada, T6G 1Z2

\* Address correspondence to X.C. Le, Department of Laboratory Medicine and  
Pathology, Faculty of Medicine and Dentistry, University of Alberta, 10-102 Clinical  
Sciences Building, Edmonton, Alberta, Canada T6G 2G3.

Telephone: (780) 492-6416. Fax: (780) 492-7800. E-mail: [xc.le@ualberta.ca](mailto:xc.le@ualberta.ca)

**Table S1.** Chemical structures of arsenicals

| Arsenical                                             | Structure                                                                                                                                                                      |
|-------------------------------------------------------|--------------------------------------------------------------------------------------------------------------------------------------------------------------------------------|
| arsenic trioxide                                      | 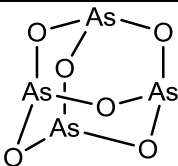                                                                                             |
| arsenite                                              | $\begin{array}{c} \text{OH} \\   \\ \text{HO}-\text{As}-\text{OH} \end{array}$                                                                                                 |
| arsenate                                              | $\begin{array}{c} \text{OH} \\   \\ \text{HO}-\text{As}-\text{OH} \\    \\ \text{O} \end{array}$                                                                               |
| monomethylarsonous acid ( $\text{MMA}^{\text{III}}$ ) | $\begin{array}{c} \text{OH} \\   \\ \text{HO}-\text{As}-\text{CH}_3 \end{array}$                                                                                               |
| dimethylarsinous acid ( $\text{DMA}^{\text{III}}$ )   | $\begin{array}{c} \text{OH} \\   \\ \text{H}_3\text{C}-\text{As}-\text{CH}_3 \end{array}$                                                                                      |
| monomethylarsonic acid ( $\text{MMA}^{\text{V}}$ )    | $\begin{array}{c} \text{OH} \\   \\ \text{HO}-\text{As}-\text{CH}_3 \\    \\ \text{O} \end{array}$                                                                             |
| dimethylarsinic acid ( $\text{DMA}^{\text{V}}$ )      | $\begin{array}{c} \text{OH} \\   \\ \text{H}_3\text{C}-\text{As}-\text{CH}_3 \\    \\ \text{O} \end{array}$                                                                    |
| trimethylarsine oxide (TMAO)                          | $\begin{array}{c} \text{O} \\    \\ \text{H}_3\text{C}-\text{As}-\text{CH}_3 \\   \\ \text{CH}_3 \end{array}$                                                                  |
| trimethylarsine (TMA)                                 | $\begin{array}{c} \text{CH}_3 \\   \\ \text{CH}_3-\text{As}-\text{CH}_3 \end{array}$                                                                                           |
| phenylarsine oxide (PAO)                              | 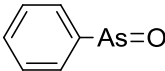                                                                                           |
| <i>p</i> -aminophenylarsine oxide (APA)               | 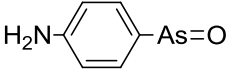                                                                                           |
| arsenic triglutathione (ATG)                          | $\begin{array}{c} \text{SG} \\   \\ \text{GS}-\text{As}-\text{SG} \end{array}$                                                                                                 |
| methylarsonous diglutathione (MADG)                   | $\begin{array}{c} \text{SG} \\   \\ \text{GS}-\text{As}-\text{CH}_3 \end{array}$                                                                                               |
| dimethylarsinous glutathione (DMAG)                   | $\begin{array}{c} \text{SG} \\   \\ \text{H}_3\text{C}-\text{As}-\text{CH}_3 \end{array}$                                                                                      |
| arsenobetaine (AsB)                                   | $\begin{array}{c} \text{CH}_3 \\   \\ \text{H}_3\text{C}-\text{As}^+-\text{CH}_3 \\   \\ \text{CH}_3 \end{array} \begin{array}{c} \text{O}^- \\ // \\ \text{CH}_2 \end{array}$ |
| arsenocholine (AsC)                                   | $\begin{array}{c} \text{CH}_3 \\   \\ \text{H}_3\text{C}-\text{As}^+-\text{CH}_3 \\   \\ \text{CH}_3 \end{array} \begin{array}{c} \text{CH}_2 \\   \\ \text{OH} \end{array}$   |
| phenylarsinic acid (PAA)                              | 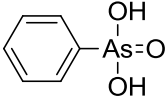                                                                                           |

|                                |                                                                                      |
|--------------------------------|--------------------------------------------------------------------------------------|
| phenyl dichloroarsine (PDA)    | 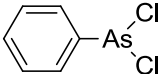   |
| phenylarsonous acid            | 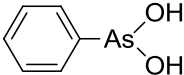   |
| 4-sulfophenylarsonous acid     | 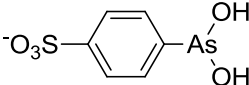   |
| Lewisite                       | 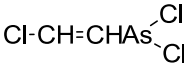   |
| <i>p</i> -arsanilate           | 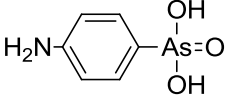   |
| <i>p</i> -nitrophenylarsonate  | 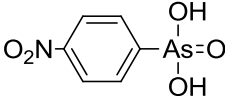   |
| <i>m</i> -nitrophenylarsonate  | 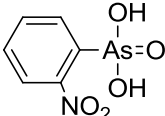   |
| <i>p</i> -tolylarsonate        | 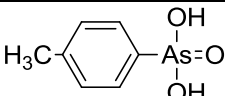   |
| 2-amino-4-arsonobutyrate       | 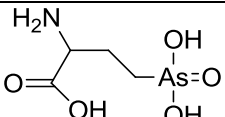  |
| 2-aminoethylarsonic acid       | 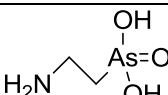 |
| 2-arsonoacetyl-L-proline       | 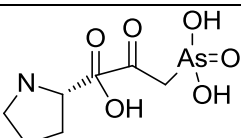 |
| 3,4-dihydroxybutylarsonic acid | 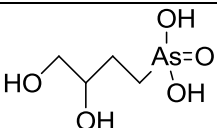 |
| 3-arsonoacrylate               | 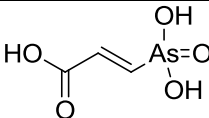 |
| 3-arsonoalanine                | 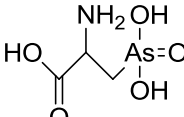 |
| 3-arsonolactate                | 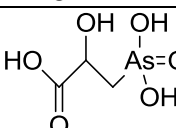 |

|                                                     |                                                                                      |
|-----------------------------------------------------|--------------------------------------------------------------------------------------|
| 3-arsonopyruvate                                    | 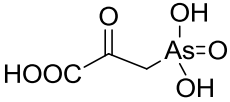   |
| 4-(4-aminophenylazo)phenylarsonic acid              | 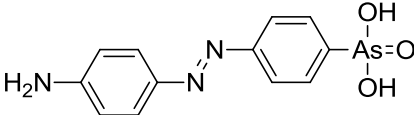   |
| 4-arsono-2-benzylbutanoic acid                      | 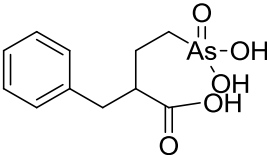   |
| arsonoacetate                                       | 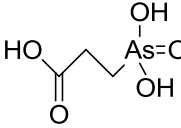   |
| arsonomethyl analogue of 2-phosphoglycerate         | 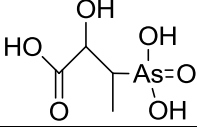   |
| arsonomethyl analogue of 3-phosphoglycerate         | 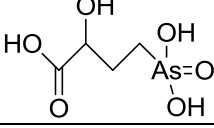   |
| arsonomethyl analogue of AMP                        | 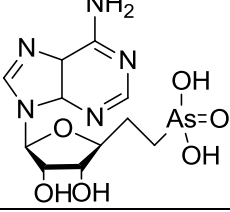  |
| 4,5-bis(1,3,2-dithiarsolan-2-yl)fluorescein (FlAsH) | 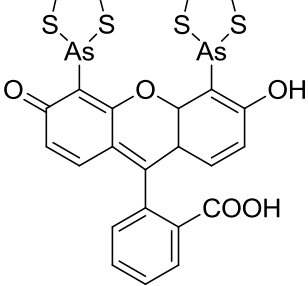 |
| 4,5-bis(1,3,2-dithiarsolan-2-yl)-resorufin (ReAsH)  | 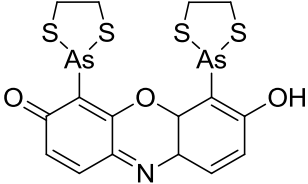 |

|                                                                                                                                                                          |  |
|--------------------------------------------------------------------------------------------------------------------------------------------------------------------------|--|
| 6-carboxy-FlAsH (CrAsH)                                                                                                                                                  |  |
| 3-(5-(1,3,2-dithiarsolan-2-yl)-3,3-dimethyl-1-(4-sulfobutyl)indolin-2-ylidene)prop-1-enyl)-5-(1,3,2-dithiarsolan-2-yl)-3,3-dimethyl-1-(4-sulfobutyl)-3H-indolium (AsCy3) |  |
| Melarsaprol (Mel B)                                                                                                                                                      |  |
| Mel T                                                                                                                                                                    |  |
| Melarsen oxide                                                                                                                                                           |  |
| Mapharsen                                                                                                                                                                |  |
| 4-(N-(S-glutathionylacetyl)amino)phenyl arsenoxide (GSAO)                                                                                                                |  |

|                                                                                                                                                |                                                                                                                                 |
|------------------------------------------------------------------------------------------------------------------------------------------------|---------------------------------------------------------------------------------------------------------------------------------|
| <i>p</i> -succinylamidephenyl arsenoxide (PSAO)                                                                                                | 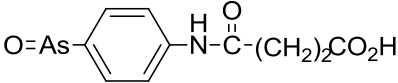 <chem>O=[As](c1ccc(NC(=O)CC(=O)O)cc1)</chem> |
| <i>N</i> -(4-(1,3,2-dithiarsolan-2-yl)phenyl)-6-(6,7-bis(2-(2-aminoethoxy)ethanol)-1,3-dioxo-1H-benzo[de]isoquinolin-2(3H)-yl)hexanamide (NPE) | 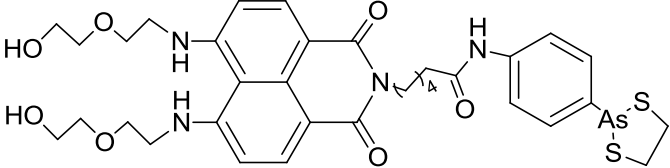                                              |

**Table S2.** Chemical structures of small thiols

| Thiol                                                       | Structure                                                                                                                                                                        |
|-------------------------------------------------------------|----------------------------------------------------------------------------------------------------------------------------------------------------------------------------------|
| glutathione                                                 |                                                                                                                                                                                  |
| dithiothreitol (DTT)                                        |                                                                                                                                                                                  |
| dithioerythritol (DTE)                                      |                                                                                                                                                                                  |
| 6,8-thioctic acid (DHLA)                                    |                                                                                                                                                                                  |
| 1,3-dithioglycerol                                          |                                                                                                                                                                                  |
| 1,2-dithioglycerol; 2,3-dimercaptopropanol (BAL)            |                                                                                                                                                                                  |
| 2,3-dimercaptopropane-1-sulfonic acid (DMPS)                | $\begin{array}{c} \text{CH}_2 - \text{CH} - \text{CH}_2 \\   \quad   \quad   \\ \text{SH} \quad \text{SH} \quad \text{SO}_3\text{H} \end{array}$                                 |
| 2,3-dimercaptosuccinic acid; 2,3-dimercaptosuccinate (DMSA) | $\begin{array}{c} \text{O}=\text{C} - \text{CH} - \text{CH} - \text{C}=\text{O} \\   \quad   \quad   \quad   \\ \text{OH} \text{SH} \quad \text{SH} \quad \text{OH} \end{array}$ |
| dihydrolipoamide                                            |                                                                                                                                                                                  |
| dihydrotrypanothione                                        |                                                                                                                                                                                  |

**Table S3.** Binding affinity between arsenicals and proteins

| Arsenical                                    | Protein                                      | $K_d$ or $K_i$ ( $\mu\text{M}$ ) | Method                                                    | Reference                           |
|----------------------------------------------|----------------------------------------------|----------------------------------|-----------------------------------------------------------|-------------------------------------|
| $(\text{CH}_3)_2\text{AsSCH}_2\text{CONH}_2$ | EcoRI methyl transferase (methylase)         | 0.053                            | Intrinsic tryptophan fluorescence                         | Tsao et al. <sup>1</sup>            |
| Arsenite                                     | Reduced xanthine oxidase                     | 0.06                             | Enzyme activity of uric acid formation measured at 295 nm | Stewart et al. <sup>2</sup>         |
| PAO                                          | Human thioredoxin                            | 0.09                             | SEC-ICPMS                                                 | Wang et al. <sup>3</sup>            |
| PAO                                          | <i>E. coli</i> thioredoxin                   | 0.1                              | SEC-ICPMS                                                 | Wang et al. <sup>3</sup>            |
| $\text{MMA}^{\text{III}}$                    | Thioredoxin reductase from mouse liver       | $\sim 0.1$                       | Enzyme activity of DTNB reduction at 412 nm               | Lin et al. <sup>4</sup>             |
| NPE                                          | Reduced BSA                                  | 0.14                             | Fluorescence polarization at 528 nm                       | Huang et al. <sup>5</sup>           |
| $\text{MMA}^{\text{III}}$                    | Human thioredoxin                            | 0.16                             | SEC-ICPMS                                                 | Wang et al. <sup>3</sup>            |
| $\text{MMA}^{\text{III}}$                    | <i>E. coli</i> thioredoxin                   | 0.23                             | SEC-ICPMS                                                 | Wang et al. <sup>3</sup>            |
| $\text{As}_2\text{O}_3$                      | Human thioredoxin                            | 0.24                             | SEC-ICPMS                                                 | Wang et al. <sup>3</sup>            |
| $\text{MMA}^{\text{III}}$                    | Thioredoxin reductase from mouse liver       | 0.25                             | Enzyme activity of NADPH oxidation at 340 nm              | Lin et al. <sup>4</sup>             |
| GSAO                                         | Thioredoxin                                  | 0.37                             | Remaining RSH content assayed with DTNB                   | Donoghue et al. <sup>6</sup>        |
| Arsenite                                     | Human serum albumin                          | 0.65                             | Equilibrium microdialysis followed by LC HG-AFS           | Jiang et al. <sup>7</sup>           |
| Melarsen oxide                               | 6-phosphofructo-2-kinase of <i>T. brucei</i> | $< 1$                            | Enzyme activity of formation of fru(2,6) $\text{P}_2$     | Van Schaftingen et al. <sup>8</sup> |
| PSAO                                         | Reduced protein disulfide isomerase (PDI)    | 1.1                              | Intrinsic tryptophan fluorescence                         | Ramadan et al. <sup>9</sup>         |

|                                      |                                                     |      |                                                                                                                    |                                     |
|--------------------------------------|-----------------------------------------------------|------|--------------------------------------------------------------------------------------------------------------------|-------------------------------------|
| Arsenite                             | Mouse hepatocytes derived arsenic methyltransferase | 1.26 | Enzyme activity of [methyl- <sup>3</sup> H]Adomet methyl transfer                                                  | Kedderis et al. <sup>10</sup>       |
| Phenylarsine oxide                   | Hemoglobin from rat                                 | 1.9  | SEC-ICPMS                                                                                                          | Lu et al. <sup>11</sup>             |
| Melarsen oxide                       | Fructose-2,6-bisphosphatase of <i>T. brucei</i>     | 2    | Enzyme activity of the release of [ <sup>32</sup> P]P <sub>i</sub> from [2- <sup>32</sup> P]fru(2,6)P <sub>2</sub> | Van Schaftingen et al. <sup>8</sup> |
| DMA <sup>III</sup>                   | Human thioredoxin                                   | 2.22 | SEC-ICPMS                                                                                                          | Wang et al. <sup>3</sup>            |
| Arsenite                             | Arsenite oxidase AioX                               | 2.4  | Intrinsic tryptophan fluorescence                                                                                  | Liu et al. <sup>12</sup>            |
| DMA <sup>III</sup>                   | <i>E. coli</i> thioredoxin                          | 3    | SEC-ICPMS                                                                                                          | Wang et al. <sup>3</sup>            |
| Arsenite                             | Galectin-1 (GAL1)                                   | 3.8  | Capillary electrophoresis with UV detection at 208 nm                                                              | Lin et al. <sup>13</sup>            |
| DMA <sup>III</sup>                   | Hemoglobin from rat                                 | 4.5  | SEC-ICPMS                                                                                                          | Lu et al. <sup>11</sup>             |
| Melarsen oxide                       | Glutathione reductase of <i>O. gutturosa</i>        | 4.5  | Enzyme activity of NADPH oxidation at 340 nm                                                                       | Muller et al. <sup>14</sup>         |
| <sup>14</sup> C-phenyldichloroarsine | Rat hemoglobin                                      | 5    | Equilibrium dialysis of <sup>14</sup> C-As binding                                                                 | Chong et al. <sup>15</sup>          |
| Arsenite                             | MCF7 derived estrogen receptor- $\alpha$            | 5    | Binding assay with [ <sup>3</sup> H]estradiol                                                                      | Stoica et al. <sup>16</sup>         |
| Mapharsen                            | Yeast aldehyde dehydrogenase                        | 6    | Enzyme activity of DPNH formation at 340 nm                                                                        | Bradbury et al. <sup>17</sup>       |
| Arsenite                             | Rabbit hepatic aldehyde oxidase                     | 6.3  | Enzyme activity of oxidation of <i>N</i> -methylnicotinamide at 330 nm                                             | Rajagopalan et al. <sup>18</sup>    |
| Arsenite                             | Oxidized xanthine oxidase                           | 8    | Enzyme activity of uric acid formation measured at 295 nm or absorbance at 380 nm                                  | Stewart et al. <sup>2</sup>         |
| Arsenite                             | Galectin-1 (GAL1)                                   | 8.2  | Intrinsic tryptophan fluorescence                                                                                  | Lin et al. <sup>13</sup>            |

|                                                     |                                                           |       |                                                                               |                                                          |
|-----------------------------------------------------|-----------------------------------------------------------|-------|-------------------------------------------------------------------------------|----------------------------------------------------------|
| Mel T                                               | Trypanothione reductase of <i>T. brucei</i>               | 9     | Enzyme activity of NADPH oxidation at 340 nm                                  | Fairlamb et al. <sup>19</sup>                            |
| MMA <sup>III</sup> (GS) <sub>2</sub>                | Yeast glutathione reductase                               | 9     | Enzyme activity of NADPH oxidation at 340 nm                                  | Stybło et al. <sup>20</sup>                              |
| Mel T                                               | Trypanothione reductase of <i>L. donovani</i>             | 9.3   | Enzyme activity of NADPH oxidation at 340 nm                                  | Cunningham et al. <sup>21</sup>                          |
| Melarsen oxide                                      | Glutathione reductase from human erythrocytes             | 9.6   | Enzyme activity of NADPH oxidation at 340 nm                                  | Cunningham et al. <sup>22</sup>                          |
| Arsenite                                            | Acetylcholinesterase from electric eel                    | 10–15 | Enzyme activity of hydrolysis of acetylthiocholine at 412 nm                  | Page et al. <sup>23</sup> and Wison et al. <sup>24</sup> |
| Arsenite                                            | ArsR                                                      | 12    | Fluorescence anisotropy with fluorescently labeled DNA                        | Qin et al. <sup>25</sup>                                 |
| Phenylarsine oxide                                  | Hemoglobin from human                                     | 12.9  | SEC–ICPMS                                                                     | Lu et al. <sup>11</sup>                                  |
| Mel T                                               | Trypanothione reductase of <i>T. cruzi</i>                | 15.5  | Enzyme activity of NADPH oxidation at 340 nm                                  | Saravanamuthu et al. <sup>26</sup>                       |
| HO(CH <sub>2</sub> ) <sub>4</sub> AsCl <sub>2</sub> | Reduced thioredoxin                                       | 16    | Intrinsic tryptophan fluorescence                                             | Brown et al. <sup>27</sup>                               |
| MMA <sup>III</sup> (GS) <sub>2</sub>                | Multidrug resistance protein 1 (MRP1) on membrane vesicle | 16    | Transport of 17β–estradiol 17–(β–D–glucuronide) by MRP1                       | Carew et al. <sup>28</sup>                               |
| Melarsen oxide                                      | Trypanothione reductase of <i>C. fasciculata</i>          | 17.2  | Enzyme activity of NADPH oxidation at 340 nm                                  | Cunningham et al. <sup>22</sup>                          |
| Melarsen oxide                                      | Recombinant <i>T. cruzi</i> trypanothione reductase       | 18    | Enzyme activity of NADPH oxidation in a DTNB–coupled assay measured at 410 nm | Hamilton et al. <sup>29</sup>                            |
| Arsenite                                            | Reduced protein disulfide isomerase (PDI)                 | 18    | Intrinsic tryptophan fluorescence                                             | Ramadan et al. <sup>9</sup>                              |
| MMA <sup>III</sup> (Cys) <sub>2</sub>               | Yeast glutathione reductase                               | 18    | Enzyme activity of NADPH oxidation at 340 nm                                  | Stybło et al. <sup>20</sup>                              |

|                    |                                                                   |      |                                                                   |                                |
|--------------------|-------------------------------------------------------------------|------|-------------------------------------------------------------------|--------------------------------|
| Arsenite           | Oxidized desulfo xanthine oxidase                                 | 20   | nm                                                                | Stewart et al. <sup>2</sup>    |
| PAO                | Arsenate reductase of <i>L. major</i>                             | ~ 20 | Charge-transfer complex absorbance at 680 nm                      | Zhou et al. <sup>30</sup>      |
| MMA <sup>III</sup> | Hemoglobin from rat                                               | 21   | Enzyme activity of NADPH oxidation at 340 nm                      | Lu et al. <sup>11</sup>        |
| Melarsen oxide     | Glutathione reductase from human erythrocytes                     | 23.7 | SEC-ICPMS                                                         | Muller et al. <sup>14</sup>    |
| Arsenite           | Oxidized xanthine oxidase                                         | 24   | Enzyme activity of NADPH oxidation at 340 nm                      | Hille et al. <sup>31</sup>     |
| MMA <sup>III</sup> | Reduced protein disulfide isomerase (PDI)                         | 25   | Charge-transfer complex absorbance at 380 nm                      | Ramadan et al. <sup>9</sup>    |
| Arsenite           | Bovine tubulin (whole protein, $\alpha$ and $\beta$ units)        | 27.1 | Intrinsic tryptophan fluorescence                                 | Kitchin et al. <sup>32</sup>   |
| Mel T              | Trypanothione reductase of <i>C. fasciculata</i>                  | 36   | Vacuum filtration binding assay                                   | Fairlamb et al. <sup>19</sup>  |
| Melarsen oxide     | Glutathione reductase of <i>S. digitata</i>                       | 38.3 | Enzyme activity of NADPH oxidation at 340 nm                      | Muller et al. <sup>14</sup>    |
| MMA <sup>III</sup> | Arsenic (iAs <sup>III</sup> ) methyltransferase from rabbit liver | 42   | Enzyme activity of [methyl- <sup>3</sup> H]Adomet methyl transfer | Zakharyan et al. <sup>33</sup> |
| Arsenite           | Arsenic (MMA <sup>III</sup> ) methyltransferase from rabbit liver | 44   | Enzyme activity of [methyl- <sup>3</sup> H]Adomet methyl transfer | Zakharyan et al. <sup>33</sup> |
| Arsenite           | Yeast aldehyde dehydrogenase                                      | 50   | Enzyme activity of DPNH formation at 340 nm                       | Bradbury et al. <sup>17</sup>  |
| DMA <sup>III</sup> | Yeast glutathione reductase                                       | 56   | Enzyme activity of NADPH oxidation at 340 nm                      | Styblo et al. <sup>20</sup>    |
| Arsenite           | ArsD                                                              | 60   | Intrinsic tryptophan fluorescence                                 | Chen et al. <sup>34</sup>      |

|                          |                                                        |       |                                                              |                                      |
|--------------------------|--------------------------------------------------------|-------|--------------------------------------------------------------|--------------------------------------|
| DMA <sup>III</sup>       | Hemoglobin from human                                  | 73.5  | SEC-ICPMS                                                    | Lu et al. <sup>11</sup>              |
| MMA <sup>III</sup>       | Yeast glutathione reductase                            | 74    | Enzyme activity of NADPH oxidation at 340 nm                 | Stybło et al. <sup>20</sup>          |
| As(Cys) <sub>3</sub>     | Yeast glutathione reductase                            | 76    | Enzyme activity of NADPH oxidation at 340 nm                 | Stybło et al. <sup>20</sup>          |
| Arsenite                 | TA3-derived cathepsin L                                | 90    | Enzyme activity with fluorogenic aminomethyl-coumarin        | Harrison et al. <sup>35</sup>        |
| Arsenite-2,3-dimercaprol | Adenylate cyclase from turkey erythrocyte membranes    | 100   | Enzyme activity of generation of [ <sup>32</sup> P]cAMP      | Spiegel et al. <sup>36</sup>         |
| Arsenite                 | Arsenate reductase                                     | 100   | Enzyme activity of NADPH oxidation at 340 nm                 | Gladysheva et al. <sup>37</sup>      |
| Melarsen oxide           | Pyruvate kinase of <i>T. brucei</i>                    | > 100 | Enzyme activity of pyruvate formation at 340 nm              | Van Schaftingen et al. <sup>8</sup>  |
| Arsenite                 | Cathepsin L                                            | 120   | Enzyme activity with fluorogenic aminomethyl-coumarin        | Harrison et al. <sup>35</sup>        |
| Arsenite-BAL             | Betaine aldehyde dehydrogenase of <i>P. aeruginosa</i> | 128   | Enzyme activity of NADPH formation at 340 nm                 | Gonzalez-Segura et al. <sup>38</sup> |
| Arsenite                 | Butyrylcholinesterase from human serum                 | 129   | Enzyme activity of hydrolysis of acetylthiocholine at 412 nm | Page et al. <sup>39</sup>            |
| MMA <sup>III</sup>       | Hemoglobin from human                                  | 200   | SEC-ICPMS                                                    | Lu et al. <sup>11</sup>              |
| Arsenite                 | Yeast aldehyde dehydrogenase                           | 200   | Enzyme activity of DPNH formation at 340 nm                  | Steinman et al. <sup>40</sup>        |
| APA                      | Lecithin-cholesterol acyltransferase                   | 230   | Enzyme activity of cholesteryl ester formation               | Jauhiainen et al. <sup>41</sup>      |

|                          |                                                                                  |        |                                                                                |                                    |
|--------------------------|----------------------------------------------------------------------------------|--------|--------------------------------------------------------------------------------|------------------------------------|
| Arsenite                 | Arsenate reductase of <i>L. major</i>                                            | 250    | Enzyme activity of NADPH oxidation at 340 nm                                   | Zhou et al. <sup>30</sup>          |
| As(GS) <sub>3</sub>      | Yeast glutathione reductase                                                      | 325    | Enzyme activity of NADPH oxidation at 340 nm                                   | Stybło et al. <sup>20</sup>        |
| As(GS) <sub>3</sub>      | Yeast glutathione reductase                                                      | 340    | Enzyme activity of NADPH oxidation at 340 nm                                   | Stybło et al. <sup>20</sup>        |
| Arsenite                 | Arsenate reductase of <i>S. aureus</i>                                           | 377    | Enzyme activity of NADPH oxidation at 340 nm                                   | Messens et al. <sup>42</sup>       |
| Arsenite                 | Hemoglobin from rat                                                              | 430    | SEC-ICPMS                                                                      | Lu et al. <sup>11</sup>            |
| DMA <sup>III</sup> (GS)  | Yeast glutathione reductase                                                      | 732    | Enzyme activity of NADPH oxidation at 340 nm                                   | Stybło et al. <sup>20</sup>        |
| Arsenite                 | 3-carboxy-4-carboxymethyl-4-hydroxycrotonolactone hydrolase from <i>A. niger</i> | 800    | Enzyme activity of conversion of $\beta$ -carboxymuconolactone to 3-oxoadipate | Thatcher et al. <sup>43</sup>      |
| DMA <sup>III</sup> (Cys) | Yeast glutathione reductase                                                      | 834    | Enzyme activity of NADPH oxidation at 340 nm                                   | Stybło et al. <sup>20</sup>        |
| Arsenite                 | Pterin derived arsenate reductase                                                | 1.2 mM | Enzyme activity of NADPH oxidation at 340 nm                                   | Duan et al. <sup>44</sup>          |
| Arsenite                 | Hemoglobin from human                                                            | 1.3 mM | SEC-ICPMS                                                                      | Lu et al. <sup>11</sup>            |
| Arsenite                 | Catalytic Domain of human Cdc25B phosphatase                                     | 4 mM   | Enzyme activity of <i>p</i> NPP hydrolysis at 405 nm                           | Bhattacharjee et al. <sup>45</sup> |
| Arsenite                 | Yeast glutathione reductase                                                      | 5.7 mM | Enzyme activity of NADPH oxidation at 340 nm                                   | Stybło et al. <sup>20</sup>        |
| Phenylarsonous acid      | Glutathione reductase                                                            | 8 mM   | Enzyme activity of NADPH oxidation at 340 nm                                   | Knowles <sup>46</sup>              |
| Arsenite                 | LMW acid phosphatase                                                             | 17 mM  | Enzyme activity of nitrophenol formation at 410 nm                             | Zhang et al. <sup>47</sup>         |

|                                       |                                                           |                          |                                                                   |                                |
|---------------------------------------|-----------------------------------------------------------|--------------------------|-------------------------------------------------------------------|--------------------------------|
| Arsenite                              | Alkaline phosphatase of <i>H. diminuta</i>                | 17.7 mM                  | Enzyme activity of nitrophenol formation at 410 nm                | Pappas et al. <sup>48</sup>    |
| Arsenite                              | Arsenic methyltransferase from rat liver                  | $K_m = 0.25 \mu\text{M}$ | Enzyme activity of [methyl- <sup>3</sup> H]Adomet methyl transfer | Lin et al. <sup>49</sup>       |
| As(GS) <sub>3</sub>                   | Multidrug resistance protein 1 (MRP1) on membrane vesicle | $K_m = 0.32 \mu\text{M}$ | <sup>73</sup> As transport assay by a rapid filtraton method      | Leslie et al. <sup>50</sup>    |
| MMA <sup>III</sup>                    | Recombinant human arsenic methyltransferase (AS3MT)       | $K_m = 1.5 \mu\text{M}$  | Methylation products by HPLC–HG–AAS                               | Ding et al. <sup>51</sup>      |
| [(GS) <sub>2</sub> AsSe] <sup>−</sup> | Multidrug resistance protein 2 (MRP2) on membrane vesicle | $K_m = 1.7 \mu\text{M}$  | <sup>73</sup> As transport assay by a rapid filtraton method      | Carew et al. <sup>52</sup>     |
| Arsenite                              | Arsenite methyltransferase from hamster liver             | $K_m = 1.8 \mu\text{M}$  | Enzyme activity of [methyl- <sup>3</sup> H]Adomet methyl transfer | Wildfang et al. <sup>53</sup>  |
| MMA <sup>III</sup>                    | Arsenic methyltransferase from Chang Human hepatocytes    | $K_m = 3 \mu\text{M}$    | Enzyme activity of [methyl- <sup>3</sup> H]Adomet methyl transfer | Zakharyan et al. <sup>33</sup> |
| Arsenite                              | Recombinant human AS3MT                                   | $K_m = 3.16 \mu\text{M}$ | Enzyme activity of [methyl- <sup>3</sup> H]Adomet methyl transfer | Geng et al. <sup>54</sup>      |
| Arsenite                              | Arsenic methyltransferase from Chang Human hepatocytes    | $K_m = 3.2 \mu\text{M}$  | Enzyme activity of [methyl- <sup>3</sup> H]Adomet methyl transfer | Zakharyan et al. <sup>33</sup> |
| MMA <sup>III</sup>                    | Arsenic methyltransferase from rhesus monkey liver        | $K_m = 3.5 \mu\text{M}$  | Enzyme activity of [methyl- <sup>3</sup> H]Adomet methyl transfer | Zakharyan et al. <sup>55</sup> |
| Arsenite                              | Mouse hepatocytes derived arsenic methyltransferase       | $K_m = 3.6 \mu\text{M}$  | Enzyme activity of [methyl- <sup>3</sup> H]Adomet methyl transfer | Kedderis et al. <sup>10</sup>  |
| Arsenite                              | Recombinant human AS3MT                                   | $K_m = 4.1 \mu\text{M}$  | Methylation products by HPLC–HG–AAS                               | Ding et al. <sup>51</sup>      |

|                                        |                                                                                    |                                    |                                                                   |                                |
|----------------------------------------|------------------------------------------------------------------------------------|------------------------------------|-------------------------------------------------------------------|--------------------------------|
| As(GS) <sub>3</sub>                    | Multidrug resistance protein 2 (MRP2) on membrane vesicle                          | $K_m = 4.2 \mu\text{M}$            | <sup>73</sup> As transport assay by a rapid filtraton method      | Carew et al. <sup>52</sup>     |
| Arsenite                               | Recombinant human AS3MT                                                            | $K_m = 4.6 \mu\text{M}$            | Enzyme activity of [methyl- <sup>3</sup> H]Adomet methyl transfer | Wood et al. <sup>56</sup>      |
| Arsenite                               | Arsenic methyltransferase from rhesus monkey liver                                 | $K_m = 5.5 \mu\text{M}$            | Enzyme activity of [methyl- <sup>3</sup> H]Adomet methyl transfer | Zakharyan et al. <sup>55</sup> |
| Arsenite                               | Arsenic methyltransferase from rabbit liver                                        | $K_m = 5.5 \mu\text{M}$            | Enzyme activity of [methyl- <sup>3</sup> H]Adomet methyl transfer | Zakharyan et al. <sup>33</sup> |
| MMA <sup>III</sup>                     | Arsenic methyltransferase from rabbit liver                                        | $K_m = 10 \mu\text{M}$             | Enzyme activity of [methyl- <sup>3</sup> H]Adomet methyl transfer | Zakharyan et al. <sup>33</sup> |
| MMA <sup>III</sup> (GS) <sub>2</sub>   | Multidrug resistance protein 1 (MRP1) on membrane vesicle                          | $K_m = 11 \mu\text{M}$             | Transport assay with ICPMS detection                              | Carew et al. <sup>28</sup>     |
| Arsenite                               | Ars ATPase of <i>E. coli</i>                                                       | $K_m = 0.1 \text{ mM}$             | <sup>73</sup> As transport assay by a rapid filtraton method      | Dey et al. <sup>57</sup>       |
| As(GS) <sub>3</sub>                    | <i>L. tarentolae</i> derived plasma membrane transport protein on membrane vesicle | $K_m = 0.1\text{--}0.2 \text{ mM}$ | <sup>73</sup> As transport assay by a rapid filtraton method      | Dey et al. <sup>58</sup>       |
| MMA <sup>III</sup>                     | MMA <sup>III</sup> methyltransferase from hamster liver                            | $K_m = 0.8 \text{ mM}$             | Enzyme activity of [methyl- <sup>3</sup> H]Adomet methyl transfer | Wildfang et al. <sup>53</sup>  |
| Arsenate                               | Arsenate reductase of <i>S. aureus</i>                                             | 0.066                              | Enzyme activity of NADPH oxidation at 340 nm                      | Messens et al. <sup>59</sup>   |
| 4-(4-aminophenylazo)phenylarsonic acid | <i>E. coli</i> alkaline phosphatase                                                | 0.13                               | Enzyme activity of nitrophenol formation at 410 nm                | Szajn et al. <sup>60</sup>     |

|                                        |                                                 |         |                                                                                |                                 |
|----------------------------------------|-------------------------------------------------|---------|--------------------------------------------------------------------------------|---------------------------------|
| 4-(4-aminophenylazo)phenylarsonic acid | <i>E. coli</i> alkaline phosphatase             | 0.15    | Spectrophotometric titration measured at 400 nm                                | Szajn et al. <sup>60</sup>      |
| Arsenate                               | Alkaline phosphatase of <i>A. nidulans</i>      | 0.15    | Enzyme activity of nitrophenol formation at 410 nm                             | Dorn <sup>61</sup>              |
| Arsenate                               | Cobalt alkaline phosphatase                     | 0.2     | Enzyme activity of nitrophenol formation at 410 nm                             | Gottesman et al. <sup>62</sup>  |
| Arsenate                               | Intestinal alkaline phosphatase                 | 0.261   | Enzyme activity of fluorogenic Attophos formation                              | Iqbal <sup>63</sup>             |
| Arsenate                               | Zinc alkaline phosphatase                       | 0.3     | Enzyme activity of nitrophenol formation at 410 nm                             | Gottesman et al. <sup>62</sup>  |
| Arsenate                               | Acid phosphatase from Ipomoea pH 6.0            | 0.46    | Enzyme activity of nitrophenol formation at 410 nm                             | Zink et al. <sup>64</sup>       |
| Arsenate                               | Mn(III)-containing acid phosphatase             | 0.5     | Enzyme activity of nitrophenol formation at 410 nm                             | Sugiura et al. <sup>65</sup>    |
| Arsenate                               | Membrane-bound or purified alkaline phosphatase | 1.0–2.7 | Enzyme activity of nitrophenol formation at 402 nm or pyrophosphate hydrolysis | Cyboron et al. <sup>66</sup>    |
| Arsenate                               | Alkaline phosphatase on membrane vesicle        | 1.67    | Enzyme activity of nitrophenol formation at 410 nm                             | Hirano et al. <sup>67</sup>     |
| Arsenate                               | Zinc alkaline phosphatase                       | 1.8     | Equilibrium dialysis of <sup>74</sup> As binding                               | Lazdunski et al. <sup>68</sup>  |
| Arsenate                               | Alkaline phosphatase on membrane vesicle        | 2       | <sup>32</sup> P-phosphate transport by a filtration method                     | Shirazi et al. <sup>69</sup>    |
| Arsenate                               | Zinc alkaline phosphatase                       | 3.2     | Equilibrium dialysis of <sup>74</sup> As binding                               | Petitclerc et al. <sup>70</sup> |
| Arsenate                               | Cobalt alkaline phosphatase                     | 3.4     | Enzyme activity of nitrophenol formation at 410 nm                             | Petitclerc et al. <sup>70</sup> |

|                  |                                                |       |                                                                                                                      |                                |
|------------------|------------------------------------------------|-------|----------------------------------------------------------------------------------------------------------------------|--------------------------------|
| Arsenate         | Alkaline phosphatase                           | 8.6   | Enzyme activity of fluorometric Attophos formation                                                                   | Whisnant et al. <sup>71</sup>  |
| Arsenate         | Intestinal alkaline phosphatase                | 8.91  | Enzyme activity of fluorogenic Attophos formation by enzyme immobilized capillary electrophoresis                    | Iqbal <sup>63</sup>            |
| Arsenate         | Mitogen-activated protein kinase phosphatase 3 | 10    | Enzyme activity of <i>p</i> NPP hydrolysis at 405 nm                                                                 | Zhou et al. <sup>72</sup>      |
| Arsenate         | Acid phosphatase                               | 10    | Enzyme activity of 4-methylumbelliferyl phosphate hydrolysis                                                         | Saha et al. <sup>73</sup>      |
| Arsenate         | Rat bone alkaline phosphatase                  | 12–26 | Enzyme activity of nitrophenol formation at 410 nm                                                                   | Fernandes et al. <sup>74</sup> |
| 3-arsonoacrylate | Pig heart fumarate hydratase                   | 14    | Enzyme activity of fumarate degradation at 240 nm                                                                    | Ali et al. <sup>75</sup>       |
| Arsenate         | Mitogen-activated protein kinase phosphatase 3 | 19    | Enzyme activity of <i>p</i> NPP hydrolysis at 405 nm                                                                 | Zhou et al. <sup>72</sup>      |
| Arsenate         | Alkaline phosphatase                           | 21    | Enzyme activity of fluorogenic Attophos formation by capillary electrophoresis in "transient-engagement" EMMA format | Whisnant et al. <sup>71</sup>  |
| Arsenate         | VHR ERK phosphatase                            | 21    | Enzyme activity of nitrophenol formation at 405 nm                                                                   | Usui et al. <sup>76</sup>      |
| Arsenate         | Purified PIPLC-released alkaline phosphatase   | 23    | Enzyme activity of nitrophenol formation at 410 nm                                                                   | Pizauro et al. <sup>77</sup>   |
| 3-arsonopyruvate | Phosphoenolpyruvate mutase                     | 27    | Enzyme activity of phosphoenolpyruvate formation at 340 nm                                                           | Chawla et al. <sup>78</sup>    |
| Arsenate         | Conidial alkaline phosphatase                  | 31    | Enzyme activity of nitrophenol formation at 410 nm                                                                   | Say et al. <sup>79</sup>       |
| Arsenate         | Membrane-bound alkaline phosphatase            | 33.8  | Enzyme activity of nitrophenol formation at 410 nm                                                                   | Curti et al. <sup>80</sup>     |

|                                        |                                                     |        |                                                                                |                                |
|----------------------------------------|-----------------------------------------------------|--------|--------------------------------------------------------------------------------|--------------------------------|
| 3-arsonolactate                        | Pig heart fumarate hydratase                        | 50     | Enzyme activity of fumarate formation at 240 nm                                | Ali et al. <sup>75</sup>       |
| Arsenate                               | Glycoprotein acid phosphatase of <i>C. albicans</i> | 50     | Enzyme activity of nitrophenol formation at ~ 405 nm                           | Odds et al. <sup>81</sup>      |
| 4-(4-aminophenylazo)phenylarsonic acid | Novo subtilisin                                     | 57     | Spectrophotometric titration measured at 478 nm                                | Glazer <sup>82</sup>           |
| Arsenate                               | Human alkaline phosphatase                          | 20–400 | Enzyme activity of nitrophenol formation at 402 nm or pyrophosphate hydrolysis | Eaton et al. <sup>83</sup>     |
| Arsenate                               | Rat osseous–plate alkaline phosphatase              | 60     | Enzyme activity of nitrophenol formation at 410 nm                             | Rezende et al. <sup>84</sup>   |
| Arsenate                               | Protein–tyrosine phosphatase 1B                     | 81     | Enzyme activity of nitrophenol formation at 410 nm                             | Sarmiento et al. <sup>85</sup> |
| Arsenate                               | Alkaline phosphatase of <i>H. diminuta</i>          | 87     | Enzyme activity of nitrophenol formation at 410 nm                             | Pappas et al. <sup>48</sup>    |
| Arsenate                               | Vacuolar alkaline phosphatase from yeast            | 100    | Enzyme activity of nitrophenol formation at 410 nm                             | Fernandez et al. <sup>86</sup> |
| Arsenate                               | Mitogen–activated protein kinase phosphatase 3      | 110    | Enzyme activity of <i>p</i> NPP hydrolysis at 405 nm                           | Zhou et al. <sup>72</sup>      |
| Arsenate                               | Alkaline phosphatase on membrane vesicle            | 120    | Enzyme activity of nitrophenol formation at 410 nm                             | Hirano et al. <sup>67</sup>    |
| Arsenate                               | Membrane–bound alkaline phosphatase                 | 150    | Enzyme activity of nitrophenol formation at 410 nm                             | Cyboron et al. <sup>87</sup>   |
| Arsenate                               | Protein tyrosine phosphatase 1B                     | 150    | Enzyme activity of nitrophenol formation at 410 nm                             | Zhang et al. <sup>88</sup>     |
| Arsenate                               | Human liver acid phosphatase                        | 180    | Enzyme activity of nitrophenol formation at 410 nm                             | VanEtten et al. <sup>89</sup>  |

|                                        |                                                  |             |                                                                                          |                                            |
|----------------------------------------|--------------------------------------------------|-------------|------------------------------------------------------------------------------------------|--------------------------------------------|
| Arsenate                               | Bovine spleen purple acid phosphatase            | 180         | Enzyme activity of nitrophenol formation at ~ 405 nm                                     | Vincent et al. <sup>90</sup>               |
| <i>p</i> -Arsanilate                   | $\alpha$ -chymotrypsin                           | 202         | Displacement of proflavine at 465 nm                                                     | Glazer <sup>91</sup>                       |
| 4-(4-aminophenylazo)phenylarsonic acid | Carlsberg subtilisin                             | 220         | Spectrophotometric titration measured at 478 nm                                          | Glazer <sup>82</sup>                       |
| Arsenate                               | Protein tyrosine phosphatase 1B                  | 230         | Isothermal titration calorimetry                                                         | Zhang et al. <sup>88</sup>                 |
| Arsenate                               | LMW acid phosphatase                             | 240         | Enzyme activity of nitrophenol formation at 410 nm                                       | Zhang et al. <sup>47</sup>                 |
| Arsenate                               | Catalytic domain of PTP $\alpha$                 | 250         | Enzyme activity of nitrophenol formation at 410 nm                                       | Wu et al. <sup>92</sup>                    |
| <i>p</i> -Arsanilate                   | $\alpha$ -chymotrypsin                           | 276         | Enzyme activity of <i>p</i> -nitrophenol formation at 410 nm                             | Glazer <sup>91</sup>                       |
| Arsenate                               | Protein tyrosine phosphatase $\alpha$            | 320         | Enzyme activity of nitrophenol formation at 410 nm                                       | Wu et al. <sup>92</sup>                    |
| Arsenate                               | Catalytic Domain of human Cdc25B phosphatase     | 400         | Enzyme activity of <i>p</i> NPP hydrolysis at 405 nm                                     | Bhattacharjee et al. <sup>45</sup>         |
| 4-arsono-2-benzylbutanoic acid         | Angiotensin-converting enzyme from rabbit lung   | 500         | Enzyme activity of histidyl-leucine formation with <i>o</i> -phthalaldehyde postlabeling | Galaray et al. <sup>93</sup>               |
| Arsenate                               | $\alpha$ -glucan phosphorylase of <i>E. coli</i> | 540         | Enzyme activity of NADPH formation at 340 nm in a coupled assay                          | Schinzel et al. <sup>94</sup>              |
| Arsenate                               | Wheat germ acid phosphatase                      | 610         | Enzyme activity of nitrophenol formation at 410 nm                                       | VanEtten et al. <sup>89</sup>              |
| Arsenate                               | Uteroferrin (acid phosphatase)                   | 0.62–2.5 mM | Enzyme activity of nitrophenol formation at ~ 405 nm                                     | Crans et al.; Pyrz et al. <sup>95,96</sup> |

|                               |                                            |         |                                                                        |                                |
|-------------------------------|--------------------------------------------|---------|------------------------------------------------------------------------|--------------------------------|
| <i>p</i> -Tolylarsonate       | $\alpha$ -chymotrypsin                     | 641     | Displacement of proflavine at 465 nm                                   | Glazer <sup>91</sup>           |
| Phenylarsonate                | Novo subtilisin                            | 680     | Displacement of 4-(4'-aminophenylazo)phenylarsonate at 478 nm          | Glazer <sup>91</sup>           |
| 3-arsonoalanine               | Aspartate ammonia lyase of <i>H. alvei</i> | 700     | Enzyme activity of fumarate formation at 240 nm                        | Ali et al. <sup>75</sup>       |
| <i>p</i> -Tolylarsonate       | $\alpha$ -chymotrypsin                     | 798     | Enzyme activity of <i>p</i> -nitrophenol formation at 410 nm           | Glazer <sup>91</sup>           |
| Arsenate                      | Yersinia PTPase                            | 882     | Enzyme activity of nitrophenol formation at 410 nm                     | Zhang et al. <sup>97</sup>     |
| Phenylarsonate                | Carlsberg subtilisin                       | 1.0 mM  | Enzyme activity of <i>N</i> -benzoyl-L-arginine ethyl ester hydrolysis | Glazer <sup>91</sup>           |
| Arsenate                      | Acid phosphatase from Ipomoea pH 5.0       | 1 mM    | Enzyme activity of nitrophenol formation at 410 nm                     | Zink et al. <sup>64</sup>      |
| AsB                           | Butyrylcholinesterase from horse serum     | ~ 1 mM  | Flow microcalorimetry                                                  | Fulladosa et al. <sup>98</sup> |
| AsC                           | Butyrylcholinesterase from horse serum     | ~ 1 mM  | Flow microcalorimetry                                                  | Fulladosa et al. <sup>98</sup> |
| Arsenate                      | Protein tyrosine phosphatase of Yersinia   | 1.03 mM | Enzyme activity of <i>p</i> NPP hydrolysis at 405 nm                   | Keng et al. <sup>99</sup>      |
| <i>p</i> -Nitrophenylarsonate | $\alpha$ -chymotrypsin                     | 1.04 mM | Displacement of proflavine at 465 nm                                   | Glazer <sup>91</sup>           |
| <i>p</i> -Arsanilate          | Carlsberg subtilisin                       | 1.1 mM  | Enzyme activity of <i>N</i> -benzoyl-L-arginine ethyl ester hydrolysis | Glazer <sup>91</sup>           |
| Arsenate                      | Carbonic anhydrase (phosphatase activity)  | 1.17 mM | Enzyme activity of nitrophenol formation at 410 nm                     | Koester et al. <sup>100</sup>  |

|                               |                                                           |              |                                                                                      |                                    |
|-------------------------------|-----------------------------------------------------------|--------------|--------------------------------------------------------------------------------------|------------------------------------|
| Arsenate                      | Protein tyrosine phosphatase $\alpha$                     | 1.23–1.72 mM | Enzyme activity of nitrophenol formation at 410 nm                                   | Zhao et al. <sup>101</sup>         |
| Arsenate                      | Ca-ATPase on muscle sarcoplasmic reticulum vesicle        | 1.2–1.8 mM   | Ca efflux and phosphorylation of Ca-ATPase                                           | Pick et al. <sup>102</sup>         |
| Phenylarsonate                | Novo subtilisin                                           | 1.3 mM       | Enzyme activity of <i>N</i> -benzoyl-L-arginine ethyl ester hydrolysis               | Glazer <sup>91</sup>               |
| Arsenate                      | Ubiquitin from bovine erythrocytes (phosphatase activity) | 1.3 mM       | Enzyme activity of nitrophenol formation at ~ 405 nm                                 | Taniguchi et al. <sup>103</sup>    |
| Arsenate                      | Protein tyrosine phosphatase of <i>S. cerevisiae</i>      | 1.5 mM       | Enzyme activity of <i>p</i> NPP hydrolysis at 405 nm                                 | Mukhopadhyay et al. <sup>104</sup> |
| <i>p</i> -Arsanilate          | Novo subtilisin                                           | 1.7 mM       | Enzyme activity of <i>N</i> -benzoyl-L-arginine ethyl ester hydrolysis               | Glazer <sup>91</sup>               |
| <i>p</i> -Arsanilate          | Novo subtilisin                                           | 1.8 mM       | Displacement of 4-(4'-aminophenylazo)phenylarsonate at 478 nm                        | Glazer <sup>91</sup>               |
| <i>m</i> -nitrophenylarsonate | Serine protease of <i>P. maltophilia</i>                  | 1.8 mM       | Enzyme activity of hydrolysis of $\alpha$ - <i>N</i> -benzoyl-L-arginine ethyl ester | Boethling <sup>105</sup>           |
| MMA <sup>V</sup>              | Catalytic Domain of human Cdc25B phosphatase              | 2 mM         | Enzyme activity of <i>p</i> NPP hydrolysis at 405 nm                                 | Bhattacharjee et al. <sup>45</sup> |
| <i>p</i> -Tolylarsonate       | Carlsberg subtilisin                                      | 2.3 mM       | Enzyme activity of <i>N</i> -benzoyl-L-arginine ethyl ester hydrolysis               | Glazer <sup>91</sup>               |
| Arsenate                      | Pea seed triosephosphate isomerase                        | 3 mM         | Enzyme activity of (R)-glyceraldehyde phosphate formation                            | Tomlinson et al. <sup>106</sup>    |
| Arsenate                      | Membrane-bound acid phosphatase                           | 3.45 mM      | Enzyme activity of nitrophenol formation at 410 nm                                   | Pappas <sup>107</sup>              |
| Arsanilic acid                | Alkaline phosphatase                                      | 3.8 mM       | Enzyme activity of nitrophenol formation at 410 nm                                   | Brenna et al. <sup>108</sup>       |
| Arsenate                      | Leishmanial antimonate reductase                          | 4 mM         | Enzyme activity of <i>p</i> NPP hydrolysis at 405 nm                                 | Zhou et al. <sup>109</sup>         |

|                         |                                                            |            |                                                                        |                                |
|-------------------------|------------------------------------------------------------|------------|------------------------------------------------------------------------|--------------------------------|
| Arsenate                | (Protein tyrosine phosphatase)<br>Acid phosphatase         | > 4 mM     | Enzyme activity of 4-methylumbelliferyl phosphate hydrolysis           | Saha et al. <sup>73</sup>      |
| Arsenate                | $\alpha$ -glucan phosphorylase of <i>T. thermophilus</i>   | 4.1 mM     | Enzyme activity of NADPH formation at 340 nm in a coupled assay        | Boeck et al. <sup>110</sup>    |
| Arsenate                | Neurospora crassa glycogen phosphorylase                   | 4–9 mM     | Enzyme activity of <sup>14</sup> C-glycogen formation                  | Shepherd et al. <sup>111</sup> |
| <i>p</i> -Tolylarsonate | Novo subtilisin                                            | 4.5 mM     | Enzyme activity of <i>N</i> -benzoyl-L-arginine ethyl ester hydrolysis | Glazer <sup>91</sup>           |
| Arsenate                | Triosephosphate isomerase from <i>T. brucei</i>            | 4.6 mM     | Enzyme activity of (R)-glyceraldehyde phosphate formation              | Lambeir et al. <sup>112</sup>  |
| Arsenate                | Protein tyrosine phosphatase of <i>Yersinia</i>            | 4.66 mM    | Enzyme activity of <i>p</i> NPP hydrolysis at 405 nm                   | Keng et al. <sup>99</sup>      |
| Arsenate                | Bovine spleen purple acid phosphatase                      | 5 mM       | Enzyme activity of 2-naphthyl phosphate hydrolysis at ~ 540 nm         | Dietrich et al. <sup>113</sup> |
| Arsenate                | Ornithine carbamoyltransferase of <i>E. coli</i>           | 5 mM       | Enzyme activity of citrulline formation at 490 nm                      | Wargnies et al. <sup>114</sup> |
| Arsenate                | Ornithine carbamoyltransferase of <i>E. coli</i> W         | 5.1 mM     | Enzyme activity of citrulline formation at 490 nm                      | Legrain et al. <sup>115</sup>  |
| Arsenate                | Triosephosphate isomerase from rabbit                      | 5.5 mM     | Enzyme activity of (R)-glyceraldehyde phosphate formation              | Burton et al. <sup>116</sup>   |
| Arsenate                | Rabbit-muscle triosephosphate isomerase                    | 5.5–6.2 mM | Enzyme activity of (R)-glyceraldehyde phosphate formation              | Lambeir et al. <sup>112</sup>  |
| Arsenate                | Subforms of triosephosphate isomerase from rabbit          | 5.7–7.3 mM | Enzyme activity of (R)-glyceraldehyde phosphate formation              | Krietsch et al. <sup>117</sup> |
| Arsenate                | Mn <sup>2+</sup> -stimulated $\lambda$ protein phosphatase | 6.0 mM     | Enzyme activity of nitrophenol formation at 410 nm                     | Reiter et al. <sup>118</sup>   |

|                               |                                                   |             |                                                                        |                                 |
|-------------------------------|---------------------------------------------------|-------------|------------------------------------------------------------------------|---------------------------------|
| Arsenate                      | Triosephosphate isomerase from rabbit             | 6.2–6.3 mM  | Enzyme activity of (R)–glyceraldehyde phosphate formation              | Krietsch et al. <sup>119</sup>  |
| DMA <sup>V</sup>              | MMA <sup>V</sup> reductase from rabbit liver      | 6.5 mM      | Enzyme activity of [ <sup>14</sup> C]MMA <sup>III</sup> formation      | Zakharyan et al. <sup>120</sup> |
| Phenylarsonate                | $\alpha$ –chymotrypsin                            | 6.5 mM      | Displacement of proflavine at 465 nm                                   | Glazer <sup>91</sup>            |
| Arsenate                      | Rabbit skeletal muscle phosphorylase              | 6.5–14.2 mM | Enzyme activity of NADPH formation at 340 nm in a coupled assay        | Helmreich et al. <sup>121</sup> |
| Arsonoacetate                 | Succinate dehydrogenase                           | 6.7 mM      | Enzyme activity of succinate oxidation at 420 nm                       | Seaman <sup>122</sup>           |
| Phenylarsonate                | $\alpha$ –chymotrypsin                            | 6.88 mM     | Enzyme activity of <i>p</i> –nitrophenol formation at 410 nm           | Glazer <sup>91</sup>            |
| 2–amino–4–arsonobutyrate      | Glutamate dehydrogenase                           | 7.3 mM      | Enzyme activity of NADH oxidation at 340 nm                            | Couee et al. <sup>123</sup>     |
| Arsenate                      | Distal domain of PTP $\alpha$                     | 8.1 mM      | Enzyme activity of nitrophenol formation at 410 nm                     | Wu et al. <sup>92</sup>         |
| <i>p</i> –Tolylarsonate       | Novo subtilisin                                   | 8.1 mM      | Displacement of 4–(4'–aminophenylazo)phenylarsonate at 478 nm          | Glazer <sup>91</sup>            |
| Arsenate                      | Yeast triosephosphate isomerase of <i>E. coli</i> | 9.6 mM      | Enzyme activity of (R)–glyceraldehyde phosphate formation              | Nickbarg et al. <sup>124</sup>  |
| <i>p</i> –Nitrophenylarsonate | Carlsberg subtilisin                              | 9.7 mM      | Enzyme activity of <i>N</i> –benzoyl–L–arginine ethyl ester hydrolysis | Glazer <sup>91</sup>            |
| <i>p</i> –Nitrophenylarsonate | Novo subtilisin                                   | 9.8 mM      | Displacement of 4–(4'–aminophenylazo)phenylarsonate at 478 nm          | Glazer <sup>91</sup>            |

|                               |                                                                                        |         |                                                                                          |                                 |
|-------------------------------|----------------------------------------------------------------------------------------|---------|------------------------------------------------------------------------------------------|---------------------------------|
| Arsenate                      | Galactose-binding protein dependent transport in <i>S. typhimurium</i> proteoliposomes | 10 mM   | [ <sup>3</sup> H]–galactose transport assay                                              | Richarme <sup>125</sup>         |
| Arsenate                      | Chicken triosephosphate isomerase                                                      | 11 mM   | Enzyme activity of (R)–glyceraldehyde phosphate formation                                | Zhang et al. <sup>126</sup>     |
| Arsenate                      | Triosephosphate isomerase from chicken                                                 | 11.1 mM | Enzyme activity of (R)–glyceraldehyde phosphate formation                                | Putman et al. <sup>127</sup>    |
| Arsenate                      | Triosephosphate isomerase from brewers' yeast                                          | 12 mM   | Enzyme activity of (R)–glyceraldehyde phosphate formation                                | Nickbarg et al. <sup>124</sup>  |
| Arsenate                      | Triosephosphate isomerase from yeast                                                   | 12 mM   | Enzyme activity of (R)–glyceraldehyde phosphate formation                                | Krietsch et al. <sup>119</sup>  |
| DMA <sup>V</sup>              | Acetyl esterase                                                                        | ~ 12 mM | Enzyme activity of phenol formation at 270 nm                                            | Zhu et al. <sup>128</sup>       |
| <i>p</i> –Nitrophenylarsonate | Novo subtilisin                                                                        | 12.1 mM | Enzyme activity of <i>N</i> –benzoyl–L–arginine ethyl ester hydrolysis                   | Glazer <sup>91</sup>            |
| Arsenate                      | MMA <sup>V</sup> reductase from rabbit liver                                           | 14 mM   | Enzyme activity of [ <sup>14</sup> C]MMA <sup>III</sup> formation                        | Zakharyan et al. <sup>120</sup> |
| 2–arsonoacetyl–L–proline      | Angiotensin–converting enzyme from rabbit lung                                         | 18 mM   | Enzyme activity of histidyl–leucine formation with <i>o</i> –phthalaldehyde postlabeling | Galardy et al. <sup>93</sup>    |
| Arsenate                      | Dual–specific protein tyrosine phosphatase                                             | 20.9 mM | Enzyme activity of nitrophenol formation at 405 nm                                       | Zhou et al. <sup>129</sup>      |
| Arsenate                      | Angiotensin–converting enzyme from rabbit lung                                         | 27 mM   | Enzyme activity of histidyl–leucine formation with <i>o</i> –phthalaldehyde postlabeling | Galardy et al. <sup>93</sup>    |
| DMA <sup>V</sup>              | Angiotensin–converting enzyme from rabbit lung                                         | 70 mM   | Enzyme activity of histidyl–leucine formation with <i>o</i> –phthalaldehyde postlabeling | Galardy et al. <sup>93</sup>    |

|                  |                                                              |                                   |                                                                   |                                |
|------------------|--------------------------------------------------------------|-----------------------------------|-------------------------------------------------------------------|--------------------------------|
| Arsenate         | Catabolic ornithine carbamoyltransferase of <i>P. putida</i> | 85 mM                             | Enzyme activity of citrulline formation at 490 nm                 | Wargnies et al. <sup>114</sup> |
| Arsenate         | Arsenate reductase of <i>S. aureus</i>                       | $K_m = 1 \mu\text{M}$             | Enzyme activity of NADPH oxidation at 340 nm                      | Ji et al. <sup>130</sup>       |
| Arsenate         | Arsenate reductase of <i>Shewanella</i>                      | $K_m = 5 \mu\text{M}$             | Enzyme activity of methyl viologen oxidation at 600 nm            | Malasarn et al. <sup>131</sup> |
| Arsenate         | Arsenate reductase of <i>S. aureus</i> plasmid pI258         | $K_m = 9\text{--}81 \mu\text{M}$  | Enzyme activity of NADPH oxidation at 340 nm                      | Roos et al. <sup>132</sup>     |
| 3-arsenopyruvate | Phosphoenolpyruvate mutase                                   | $K_m = 20 \mu\text{M}$            | Enzyme activity of pyruvate formation at 340 nm                   | Chawla et al. <sup>78</sup>    |
| Arsenate         | Arsenate reductase of <i>B. seleitireducens</i>              | $K_m = 34 \mu\text{M}$            | Enzyme activity of methyl viologen oxidation at 600 nm            | Afkar et al. <sup>133</sup>    |
| Arsenate         | Arsenate reductase of <i>B. subtilis</i>                     | $K_m = 47\text{--}64 \mu\text{M}$ | Enzyme activity of NADPH oxidation at 340 nm                      | Roos et al. <sup>132</sup>     |
| Arsenate         | Arsenate reductase of <i>S. aureus</i>                       | $K_m = 68 \mu\text{M}$            | Enzyme activity of NADPH oxidation at 340 nm                      | Messens et al. <sup>42</sup>   |
| MMA <sup>V</sup> | Arsenic methyltransferase from rabbit liver                  | $K_m = 70 \mu\text{M}$            | Enzyme activity of [methyl- <sup>3</sup> H]Adomet methyl transfer | Zakharyan et al. <sup>33</sup> |
| Arsenate         | Arsenate reductase of SES-3                                  | $K_m = 0.2 \text{ mM}$            | Enzyme activity of methyl viologen oxidation at 600 nm            | Newman <sup>134</sup>          |
| Arsenate         | Arsenate reductase of <i>C. arsenatis</i>                    | $K_m = 0.3 \text{ mM}$            | Enzyme activity of benzyl viologen oxidation at 546 nm            | Krafft et al. <sup>135</sup>   |
| Arsenate         | Pseudomonas derived arsenate reductase                       | $K_m = 0.4 \text{ mM}$            | Enzyme activity of NADPH oxidation at 340 nm                      | Joshi et al. <sup>136</sup>    |

|                                |                                                                   |                                     |                                                                                        |                                    |
|--------------------------------|-------------------------------------------------------------------|-------------------------------------|----------------------------------------------------------------------------------------|------------------------------------|
| 3,4-dihydroxybutylarsonic acid | Glycerol-3-phosphate dehydrogenase                                | $K_m = 0.55 \text{ mM}$             | Enzyme activity of NADH formation at 340 nm                                            | Mutenda et al. <sup>137</sup>      |
| Arsenate                       | ATP-synthase from beef heart submitochondrial particles           | $K_m = 0.8 \text{ mM}$              | Enzyme activity of NADPH formation at 340 nm in a coupled assay                        | Moore et al. <sup>138</sup>        |
| Arsenate                       | Human liver arsenate reductase                                    | $K_m = 0.81\text{--}1.8 \text{ mM}$ | Enzyme activity of [ <sup>73</sup> As]arsenate reduction by HPLC                       | Radabaugh et al. <sup>139</sup>    |
| Arsenate                       | Cellobiose phosphorylase from <i>C. uda</i>                       | $K_m = 0.9 \text{ mM}$              | Enzyme activity of D-glucose release by glucoanalysis                                  | Nidetzky et al. <sup>140</sup>     |
| Arsenate                       | Catalytic Domain of human Cdc25C phosphatase (arsenate reductase) | $K_m = 0.9\text{--}1.7 \text{ mM}$  | Enzyme activity of NADPH oxidation                                                     | Bhattacharjee et al. <sup>45</sup> |
| Arsenate                       | Succinic thiokinase                                               | $K_m = 1 \text{ mM}$                | Enzymatic activity of succinyl-CoA arsenolysis                                         | Cha et al. <sup>141</sup>          |
| Arsenate                       | Arsenate reductase of <i>Synechocystis</i>                        | $K_m = 1.25 \text{ mM}$             | Enzyme activity of NADPH oxidation at 340 nm                                           | Li et al. <sup>142</sup>           |
| Arsenate                       | Aspartate- $\beta$ -semialdehyde dehydrogenase                    | $K_m = 1.6 \text{ mM}$              | Enzyme activity of NADPH oxidation at 340 nm                                           | Kish et al. <sup>143</sup>         |
| Arsenate                       | Purine nucleoside phosphorylase from human erythrocytes           | $K_m = 1.8 \text{ mM}$              | Enzyme activity of inosine monophosphate formation in a xanthine oxidase-coupled assay | De Verdier et al. <sup>144</sup>   |
| Arsenate                       | Ornithine carbamoyltransferase of <i>E. coli</i> W                | $K_m = 1.8 \text{ mM}$              | Enzyme activity of citrulline degradation                                              | Legrain et al. <sup>115</sup>      |

|                                             |                                                                   |                                  |                                                                    |                                       |
|---------------------------------------------|-------------------------------------------------------------------|----------------------------------|--------------------------------------------------------------------|---------------------------------------|
| MMA <sup>V</sup>                            | MMA <sup>V</sup> reductase from rabbit liver                      | $K_m = 2.2 \text{ mM}$           | Enzyme activity of [ <sup>14</sup> C]MMA <sup>III</sup> formation  | Zakharyan et al. <sup>120</sup>       |
| Arsenate                                    | Pteria derived arsenate reductase                                 | $K_m = 2.3 \text{ mM}$           | Enzyme activity of NADPH oxidation at 340 nm                       | Duan et al. <sup>44</sup>             |
| Arsenate                                    | Catalytic Domain of human Cdc25B phosphatase (arsenate reductase) | $K_m = 2.5\text{--}5 \text{ mM}$ | Enzyme activity of NADPH oxidation                                 | Bhattacharjee et al. <sup>45</sup>    |
| 2-aminoethylarsonic acid                    | Ethanolamine-phosphate cytidylyltransferase                       | $K_m \sim 3 \text{ mM}$          | Enzyme activity of CTP hydrolysis at 280 nm                        | Visedo-Gonzalez et al. <sup>145</sup> |
| Arsenate                                    | Rabbit skeletal muscle phosphorylase                              | $K_m = 3\text{--}9 \text{ mM}$   | Enzyme activity of glucose release involving glucose dehydrogenase | Helmreich et al. <sup>146</sup>       |
| Arsenate                                    | Ornithine carbamoyltransferase of <i>S. cerevisiae</i>            | $K_m = 3.4 \text{ mM}$           | Enzyme activity of citrulline degradation                          | Simon et al. <sup>147,148</sup>       |
| Arsenate                                    | Trehalose phosphorylase from <i>S. commune</i>                    | $K_m = 3.8 \text{ mM}$           | Enzyme activity of D-glucose release by glucoanalysis              | Eis et al. <sup>149</sup>             |
| Arsenate                                    | Arsenate reductase of <i>L. major</i>                             | $K_m = 6 \text{ mM}$             | Enzyme activity of NADPH oxidation at 340 nm                       | Zhou et al. <sup>30</sup>             |
| Arsonomethyl analogue of 3-phosphoglycerate | Phosphoglycerate kinase                                           | $K_m = 6.1 \text{ mM}$           | Enzyme activity of NADPH oxidation at 340 nm                       | Adams et al. <sup>150</sup>           |
| Arsonomethyl analogue of 2-phosphoglycerate | Enolase                                                           | $K_m = 6.5 \text{ mM}$           | Enzyme activity of dehydration at 240 nm                           | Chawla et al. <sup>151</sup>          |
| Arsenate                                    | Arsenate reductase                                                | $K_m = 8 \text{ mM}$             | Enzyme activity of NADPH oxidation at 340 nm                       | Gladysheva et al. <sup>37</sup>       |

|                              |                                                   |                                  |                                                                    |                                    |
|------------------------------|---------------------------------------------------|----------------------------------|--------------------------------------------------------------------|------------------------------------|
| Arsenate                     | Arsenate reductase of OsACR2.2                    | $K_m = 9.2 \text{ mM}$           | Enzyme activity of NADPH oxidation at 340 nm                       | Duan et al. <sup>152</sup>         |
| Arsonomethyl analogue of AMP | Adenylate kinase                                  | $K_m = 10 \text{ mM}$            | Enzyme activity of NADH formation at 340 nm in a coupled assay     | Adams et al. <sup>150,153</sup>    |
| Arsenate                     | Arsenate reductase of OsACR2.1                    | $K_m = 12.2 \text{ mM}$          | Enzyme activity of NADPH oxidation at 340 nm                       | Duan et al. <sup>152</sup>         |
| Arsenate                     | Arsenate reductase of <i>E. coli</i> plasmid R773 | $K_m = 15.2 \text{ mM}$          | Enzyme activity of NADPH oxidation at 340 nm                       | Shi et al. <sup>154</sup>          |
| Arsenate                     | Rabbit skeletal muscle phosphorylase              | $K_m = 16\text{--}43 \text{ mM}$ | Enzyme activity of glucose release involving glucose dehydrogenase | Helmreich et al. <sup>146</sup>    |
| DMA <sup>V</sup>             | MMA <sup>V</sup> reductase from rabbit liver      | $K_m = 20.9 \text{ mM}$          | Enzyme activity of [ <sup>14</sup> C]MMA <sup>III</sup> formation  | Zakharyan et al. <sup>120</sup>    |
| MMA <sup>V</sup>             | Recombinant human GSTO1–1                         | $K_m = 23.5 \text{ mM}$          | Enzyme activity of [ <sup>14</sup> C]MMA <sup>III</sup> formation  | Zakharyan et al. <sup>155</sup>    |
| MMA <sup>V</sup>             | MMA <sup>V</sup> reductase from human liver       | $K_m = 23.6 \text{ mM}$          | Enzyme activity of [ <sup>14</sup> C]MMA <sup>III</sup> formation  | Zakharyan et al. <sup>155</sup>    |
| Arsenate                     | Arsenate reductase of <i>P. vittata</i>           | $K_m = 28 \text{ mM}$            | Enzyme activity of NADPH oxidation at 340 nm                       | Ellis et al. <sup>156</sup>        |
| DMA <sup>V</sup>             | Recombinant human GSTO1–1                         | $K_m = 30.6 \text{ mM}$          | Enzyme activity of [ <sup>14</sup> C]DMA <sup>III</sup> formation  | Zakharyan et al. <sup>157</sup>    |
| Arsenate                     | Recombinant human GSTO1–1                         | $K_m = 34.8 \text{ mM}$          | Enzyme activity of arsenite formation determined by HPLC–ICPMS     | Zakharyan et al. <sup>157</sup>    |
| Arsenate                     | Arsenate reductase of <i>S. cerevisiae</i>        | $K_m = 35 \text{ mM}$            | Enzyme activity of NADPH oxidation at 340 nm                       | Mukhopadhyay et al. <sup>158</sup> |

|                  |                                               |                         |                                                                   |                                     |
|------------------|-----------------------------------------------|-------------------------|-------------------------------------------------------------------|-------------------------------------|
| MMA <sup>V</sup> | Human glutathione S-transferase omega GSTO1-1 | $K_m = 42 \text{ mM}$   | Enzyme activity of NADPH oxidation at 340 nm                      | Sampayo-Reyes et al. <sup>159</sup> |
| MMA <sup>V</sup> | Recombinant human GSTO1-1                     | $K_m = 53.6 \text{ mM}$ | Enzyme activity of [ <sup>14</sup> C]MMA <sup>III</sup> formation | Zakharyan et al. <sup>157</sup>     |
| Arsenate         | MMA <sup>V</sup> reductase from rabbit liver  | $K_m = 109 \text{ mM}$  | Enzyme activity of [ <sup>14</sup> C]MMA <sup>III</sup> formation | Zakharyan et al. <sup>120</sup>     |

N.B. Only gene-encoded wild-type polypeptides (proteins) are included in the table. Tetracysteine fused proteins as investigated in ref [160, 161], and mutated proteins as investigated in the cited articles and in ref [162–168] are excluded from the table.

## References

- (1) Tsao, D. H. H.; Maki, A. H. *Biochemistry* **1991**, *30*, 4565.
- (2) Stewart, R. C.; Hille, R.; Massey, V. *J. Biol. Chem.* **1984**, *259*, 14426.
- (3) Wang, Z.; Zhang, H.; Li, X. F.; Le, X. C. *Rapid Commun. Mass Spectrom.* **2007**, *21*, 3658.
- (4) Lin, S.; Del Razo, L. M.; Styblo, M.; Wang, C.; Cullen, W. R.; Thomas, D. J. *Chem. Res. Toxicol.* **2001**, *14*, 305.
- (5) Huang, C.; Yin, Q.; Zhu, W.; Yang, Y.; Wang, X.; Qian, X.; Xu, Y. *Angew. Chem. Int. Ed.* **2011**, *50*, 7551.
- (6) Donoghue, N.; Yam, P. T. W.; Jiang, X. M.; Hogg, P. J. *Protein Sci.* **2000**, *9*, 2436.
- (7) Jiang, H.; Ding, J.; Chang, P.; Chen, Z.; Sun, G. *Chromatographia* **2010**, *71*, 1075.
- (8) Schaftingen, E.; Opperdoes, F. R.; Hers, H. G. *Euro. J. Biochem.* **1987**, *166*, 653.
- (9) Ramadan, D.; Rancy, P. C.; Nagarkar, R. P.; Schneider, J. P.; Thorpe, C. *Biochemistry* **2008**, *48*, 424.
- (10) Kedderis, G. L.; Elmore, A. R.; Crecelius, E. A.; Yager, J. W.; Goldsworthy, T. L. *Chem. Biol. Interact.* **2006**, *161*, 139.
- (11) Lu, M.; Wang, H.; Li, X. F.; Lu, X.; Cullen, W. R.; Arnold, L. L.; Cohen, S. M.; Le, X. C. *Chem. Res. Toxicol.* **2004**, *17*, 1733.
- (12) Liu, G.; Liu, M.; Kim, E. H.; Matty, W.; Bothner, B.; Lei, B.; Rensing, C.; Wang, G.; McDermott, T. R. *Environ. Microbiol.* **2012**, *14*, 1624.
- (13) Lin, C. H.; Huang, C. F.; Chen, W. Y.; Chang, Y. Y.; Ding, W. H.; Lin, M. S.; Wu, S. H.; Huang, R. N. *Chem. Res. Toxicol.* **2006**, *19*, 469.
- (14) Muller, S.; Walter, R. D.; Fairlamb, A. H. *Mol. Biochem. Parasitol.* **1995**, *71*, 211.
- (15) Chong, S.; Dill, K.; McGown, E. *J. Biochem. Toxicol.* **1989**, *4*, 39.
- (16) Stoica, A.; Pentecost, E.; Martin, M. B. *Endocrinology* **2000**, *141*, 3595.
- (17) Bradbury, S. L.; Jakoby, W. B. *Proc. Natl. Acad. Sci. U. S. A.* **1972**, *69*, 2373.
- (18) Rajagopalan, K.; Handler, P. *J. Biol. Chem.* **1964**, *239*, 2027.
- (19) Fairlamb, A. H.; Henderson, G. B.; Cerami, A. *Proc. Natl. Acad. Sci. U. S. A.* **1989**, *86*, 2607.

- (20) Styblo, M.; Serves, S. V.; Cullen, W. R.; Thomas, D. J. *Chem. Res. Toxicol.* **1997**, *10*, 27.
- (21) Cunningham, M. L.; Fairlamb, A. H. *Euro. J. Biochem.* **1995**, *230*, 460.
- (22) Cunningham, M. L.; Zvelebil, M. J. J. M.; Fairlamb, A. H. *Euro. J. Biochem.* **1994**, *221*, 285.
- (23) Page, J. D.; Wilson, I. B. *J. Biol. Chem.* **1985**, *260*, 1475.
- (24) Wilson, I. B.; Silman, I. *Biochemistry* **1977**, *16*, 2701.
- (25) Qin, J.; Fu, H. L.; Ye, J.; Bencze, K. Z.; Stemmler, T. L.; Rawlings, D. E.; Rosen, B. P. *J. Biol. Chem.* **2007**, *282*, 34346.
- (26) Saravanamuthu, A.; Vickers, T. J.; Bond, C. S.; Peterson, M. R.; Hunter, W. N.; Fairlamb, A. H. *J. Biol. Chem.* **2004**, *279*, 29493.
- (27) Brown, S. B.; Turner, R. J.; Roche, R. S.; Stevenson, K. J. *Biochemistry* **1987**, *26*, 863.
- (28) Carew, M. W.; Naranmandura, H.; Shukalek, C. B.; Le, X. C.; Leslie, E. M. *Drug Metab. Disp* **2011**, *39*, 2298.
- (29) Hamilton, C. J.; Saravanamuthu, A.; Eggleston, I. M.; Fairlamb, A. H. *Biochem. J.* **2003**, *369*, 529.
- (30) Zhou, Y.; Messier, N.; Ouellette, M.; Rosen, B. P.; Mukhopadhyay, R. *J. Biol. Chem.* **2004**, *279*, 37445.
- (31) Hille, R.; Stewart, R. C.; Fee, J. A.; Massey, V. *J. Biol. Chem.* **1983**, *258*, 4849.
- (32) Kitchin, K. T.; Wallace, K. J. *Inorg. Biochem.* **2008**, *102*, 532.
- (33) Zakharyan, R. A.; Ayala-Fierro, F.; Cullen, W. R.; Carter, D. M.; Aposhian, H. V. *Toxicol. Appl. Pharmacol.* **1999**, *158*, 9.
- (34) Chen, Y.; Rosen, B. P. *J. Biol. Chem.* **1997**, *272*, 14257.
- (35) Harrison, M. T.; McCoy, K. L. *Int. Immunopharmacol.* **2001**, *1*, 647.
- (36) Spiegel, A. M.; Brown, E. M.; Aurbach, G. D. *J. Cyclic Nucleotide Res.* **1976**, *2*, 393.
- (37) Gladysheva, T. B.; Oden, K. L.; Rosen, B. P. *Biochemistry* **1994**, *33*, 7288.
- (38) González-Segura, L.; Mújica-Jiménez, C.; Muñoz-Clares, R. A. *Chem. Biol. Interact.* **2009**, *178*, 64.
- (39) Page, J. D.; Wilson, I. B.; Silman, I. *Mol. Pharmacol.* **1985**, *27*, 437.
- (40) Steinman, C. R.; Jakoby, W. B. *J. Biol. Chem.* **1968**, *243*, 730.
- (41) Jauhiainen, M.; Stevenson, K. J.; Dolphin, P. J. *J. Biol. Chem.* **1988**, *263*, 6526.
- (42) Messens, J.; Martins, J. C.; Brosens, E.; Van Belle, K.; Jacobs, D. M.; Willem, R.; Wyns, L. *J. Biol. Inorg. Chem.* **2002**, *7*, 146.
- (43) Thatcher, D.; Cain, R. *Biochem. J.* **1970**, *120*, 28P.
- (44) Duan, G. L.; Zhu, Y. G.; Tong, Y. P.; Cai, C.; Kneer, R. *Plant Physiol.* **2005**, *138*, 461.
- (45) Bhattacharjee, H.; Sheng, J.; Ajees, A. A.; Mukhopadhyay, R.; Rosen, B. P. *Biochemistry* **2010**, *49*, 802.
- (46) Knowles, F. C. *Arch. Biochem. Biophys.* **1985**, *242*, 1.
- (47) Zhang, Z. Y.; Van Etten, R. L. *Arch. Biochem. Biophys.* **1990**, *282*, 39.
- (48) Pappas, P. W.; Leiby, D. A. *J. Cell. Biochem.* **1989**, *40*, 239.
- (49) Lin, S.; Shi, Q.; Nix, F. B.; Styblo, M.; Beck, M. A.; Herbin-Davis, K. M.; Hall, L. L.; Simeonsson, J. B.; Thomas, D. J. *J. Biol. Chem.* **2002**, *277*, 10795.

- (50) Leslie, E. M.; Haimeur, A.; Waalkes, M. P. *J. Biol. Chem.* **2004**, 279, 32700.
- (51) Ding, L.; Saunders, R. J.; Drobná, Z.; Walton, F. S.; Xun, P.; Thomas, D. J.; Stýblo, M. *Toxicol. Appl. Pharmacol.* **2012**, 264, 121.
- (52) Carew, M. W.; Leslie, E. M. *Carcinogenesis* **2010**, 31, 1450.
- (53) Wildfang, E.; Zakharyan, R. A.; Aposhian, H. V. *Toxicol. Appl. Pharmacol.* **1998**, 152, 366.
- (54) Geng, Z.; Song, X.; Xing, Z.; Geng, J.; Zhang, S.; Zhang, X.; Wang, Z. *J. Biol. Inorg. Chem.* **2009**, 14, 485.
- (55) Zakharyan, R. A.; Wildfang, E.; Aposhian, H. V. *Toxicol. Appl. Pharmacol.* **1996**, 140, 77.
- (56) Wood, T. C.; Salavagionne, O. E.; Mukherjee, B.; Wang, L.; Klumpp, A. F.; Thomae, B. A.; Eckloff, B. W.; Schaid, D. J.; Wieben, E. D.; Weinshilboum, R. M. *J. Biol. Chem.* **2006**, 281, 7364.
- (57) Dey, S.; Dou, D.; Rosen, B. P. *J. Biol. Chem.* **1994**, 269, 25442.
- (58) Dey, S.; Ouellette, M.; Lightbody, J.; Papadopoulou, B.; Rosen, B. P. *Proc. Natl. Acad. Sci. U. S. A.* **1996**, 93, 2192.
- (59) Messens, J.; Hayburn, G.; Desmyter, A.; Laus, G.; Wyns, L. *Biochemistry* **1999**, 38, 16857.
- (60) Szajn, H.; Csopak, H.; Folsch, G. *Biochim. Biophys. Acta (BBA)–Enzymol.* **1977**, 480, 154.
- (61) Dorn, G. L. *J. Biol. Chem.* **1968**, 243, 3500.
- (62) Gottesman, M.; Simpson, R. T.; Vallee, B. L. *Biochemistry* **1969**, 8, 3776.
- (63) Iqbal, J. *Anal. Biochem.* **2011**, 414, 226.
- (64) Zink, M. W.; Veliky, I. A. *Plant Cell, Tissue and Organ Culture* **1981**, 1, 265.
- (65) Sugiura, Y.; Kawabe, H.; Tanaka, H.; Fujimoto, S.; Ohara, A. *J. Biol. Chem.* **1981**, 256, 10664.
- (66) Cyboron, G. W.; Vejins, M. S.; Wuthier, R. E. *J. Biol. Chem.* **1982**, 257, 4141.
- (67) Hirano, K.; Iizumi, Y.; Mori, Y.; Toyoshi, K.; Sugiura, M.; Iino, S. *J. Biochem.* **1985**, 97, 1461.
- (68) Lazdunski, C.; Petitclerc, C.; Chappelet, D.; Lazdunski, M. *Biochem. Biophys. Res. Commun.* **1969**, 37, 744.
- (69) Shirazi, S. P.; Beechey, R. B.; Butterworth, P. J. *Biochem. J.* **1981**, 194, 803.
- (70) Petitclerc, C.; Lazdunski, C.; Chappelet, D.; Moulin, A.; Lazdunski, M. *Eur. J. Biochem.* **1970**, 14, 301.
- (71) Whisnant, A. R.; Gilman, S. D. *Anal. Biochem.* **2002**, 307, 226.
- (72) Zhou, B.; Zhang, Z. Y. *J. Biol. Chem.* **1999**, 274, 35526.
- (73) Saha, A. K.; Crans, D. C.; Pope, M. T.; Simone, C. M.; Glew, R. H. *J. Biol. Chem.* **1991**, 266, 3511.
- (74) Fernandes, S. S.; Furriel, R. P. M.; Petenusci, S. O.; Leone, F. A. *Biochem. Pharmacol.* **1999**, 58, 841.
- (75) Ali, B. R. S.; Dixon, H. B. F. *Euro. J. Biochem.* **1993**, 215, 161.
- (76) Usui, T.; Kojima, S.; Kidokoro, S.; Ueda, K.; Osada, H.; Sodeoka, M. *Chem. Biol.* **2001**, 8, 1209.
- (77) Pizauro, J. M.; Ciancaglini, P.; Leone, F. A. *Mol. Cell. Biochem.* **1995**, 152, 121.
- (78) Chawla, S.; Mutenda, E. K.; Dixon, H. B.; Freeman, S.; Smith, A. W. *Biochem. J.* **1995**, 308, 931.

- (79) Say, J. C.; Furriel, R. P. M.; Ciancaglini, P.; Jorge, J. A.; Lourdes, M.; Polizeli, T. M.; Pizauro, J. M.; Terenzi, H. F.; Leone, F. A. *Phytochemistry* **1996**, *41*, 71.
- (80) Curti, C.; Pizauro, J. M.; Ciancaglini, P.; Leone, F. A. *Cell Mol. Biol.* **1987**, *33*, 625.
- (81) Odds, F. C.; Hierholzer, J. C. *J. Bacteriol.* **1973**, *114*, 257.
- (82) Glazer, A. N. *Proc. Natl. Acad. Sci. U. S. A.* **1968**, *59*, 996.
- (83) Eaton, R. H.; Moss, D. W. *Biochem. J.* **1967**, *102*, 917.
- (84) Rezende, A. A.; Pizauro, J. M.; Ciancaglini, P.; Leone, F. A. *Biochem. J.* **1994**, *301*, 517.
- (85) Sarmiento, M.; Zhao, Y.; Gordon, S. J.; Zhang, Z. Y. *J. Biol. Chem.* **1998**, *273*, 26368.
- (86) Fernandez, M. P.; Gascon, S.; Schwencke, J. *Curr. Microbiol.* **1981**, *6*, 121.
- (87) Cyboron, G. W.; Wuthier, R. E. *J. Biol. Chem.* **1981**, *256*, 7262.
- (88) Zhang, Y. L.; Zhang, Z. Y. *Anal. Biochem.* **1998**, *261*, 139.
- (89) VanEtten, R. L.; Waymack, P. P.; Rehkop, D. M. *J. Am. Chem. Soc.* **1974**, *96*, 6782.
- (90) Vincent, J. B.; Crowder, M. W.; Averill, B. A. *Biochemistry* **1991**, *30*, 3025.
- (91) Glazer, A. N. *J. Biol. Chem.* **1968**, *243*, 3693.
- (92) Wu, L.; Buist, A.; den Hertog, J.; Zhang, Z. Y. *J. Biol. Chem.* **1997**, *272*, 6994.
- (93) Galardy, R. E.; Kortylewicz, Z. P. *Biochem. J.* **1985**, *226*, 447.
- (94) Schinzel, R.; Palm, D. *Biochemistry* **1990**, *29*, 9956.
- (95) Crans, D. C.; Simone, C. M.; Holz, R. C.; Que Jr, L. *Biochemistry* **1992**, *31*, 11731.
- (96) Pyrz, J. W.; Sage, J. T.; Debrunner, P. G.; Que, L. *J. Biol. Chem.* **1986**, *261*, 11015.
- (97) Zhang, Z. Y.; Wang, Y.; Wu, L.; Fauman, E. B.; Stuckey, J. A.; Schubert, H. L.; Saper, M. A.; Dixon, J. E. *Biochemistry* **1994**, *33*, 15266.
- (98) Fulladosa, E.; Debord, J.; Villaescusa, I.; Bollinger, J. C.; Murat, J. C. *Environ. Chem. Lett.* **2007**, *5*, 115.
- (99) Keng, Y. F.; Wu, L.; Zhang, Z. Y. *Euro. J. Biochem.* **1999**, *259*, 809.
- (100) Koester, M. K.; Pullan, L. M.; Noltmann, E. A. *Arch. Biochem. Biophys.* **1981**, *211*, 632.
- (101) Zhao, Y.; Wu, L.; Noh, S. J.; Guan, K. L.; Zhang, Z. Y. *J. Biol. Chem.* **1998**, *273*, 5484.
- (102) Pick, U.; Bassilian, S. *Euro. J. Biochem.* **1983**, *131*, 393.
- (103) Taniguchi, N.; Matsumoto, H. *Comp. Biochem. Physiol. Part B: Comp. Biochem.* **1985**, *81*, 587.
- (104) Mukhopadhyay, R.; Zhou, Y.; Rosen, B. P. *J. Biol. Chem.* **2003**, *278*, 24476.
- (105) Boethling, R. S. *J. Bacteriol.* **1975**, *121*, 933.
- (106) Tomlinson, J. D.; Turner, J. F. *Phytochemistry* **1979**, *18*, 1959.
- (107) Pappas, P. W. *Exp. Parasitol.* **1991**, *72*, 362.
- (108) Brenna, O.; Perrella, M.; Pace, M.; Pietta, P. G. *Biochem. J.* **1975**, *151*, 291.

- (109) Zhou, Y.; Bhattacharjee, H.; Mukhopadhyay, R. *Mol. Biochem. Parasitol.* **2006**, *148*, 161.
- (110) Boeck, B.; Schinzel, R. *Euro. J. Biochem.* **1996**, *239*, 150.
- (111) Shepherd, D.; Rosenthal, S.; Lundblad, G. T.; Segel, I. H. *Arch. Biochem. Biophys.* **1969**, *135*, 334.
- (112) Lambeir, A. M.; Oppendoes, F. R.; Wierenga, R. K. *Euro. J. Biochem.* **1987**, *168*, 69.
- (113) Dietrich, M.; Munstermann, D.; Suerbaum, H.; Witzel, H. *Euro. J. Biochem.* **1991**, *199*, 105.
- (114) Wagnies, B.; Legrain, C.; Stalon, V. *Euro. J. Biochem.* **1978**, *89*, 203.
- (115) Legrain, C.; Stalon, V. *Euro. J. Biochem.* **1976**, *63*, 289.
- (116) Burton, P. M.; Waley, S. G. *Biochim. Biophys. Acta* **1968**, *151*, 714.
- (117) Krietsch, W. K. G.; Pentchev, P. G.; Klingenburg, H. *Euro. J. Biochem.* **1971**, *23*, 77.
- (118) Reiter, N. J.; White, D. J.; Rusnak, F. *Biochemistry* **2002**, *41*, 1051.
- (119) Krietsch, W. K. G.; Pentchev, P. G.; Klingenburg, H.; Hofstätter, T.; Bücher, T. *Euro. J. Biochem.* **1970**, *14*, 289.
- (120) Zakharyan, R. A.; Aposhian, H. V. *Chem. Res. Toxicol.* **1999**, *12*, 1278.
- (121) Helmreich, E.; Cori, C. F. *Proc. Natl. Acad. Sci. U. S. A.* **1964**, *51*, 131.
- (122) Seaman, G. R. *Exp. Parasitol.* **1953**, *2*, 366.
- (123) Couee, I.; Dixon, H. B.; Tipton, K. F. *J. Enzyme Inhib.* **1991**, *4*, 365.
- (124) Nickbarg, E. B.; Knowles, J. R. *Biochemistry* **1988**, *27*, 5939.
- (125) Richarme, G. *A Biochem. J.* **1988**, *253*, 371.
- (126) Zhang, Z.; Komives, E. A.; Sugio, S.; Blacklow, S. C.; Narayana, N.; Xuong, N. H.; Stock, A. M.; Petsko, G. A.; Ringe, D. *Biochemistry* **1999**, *38*, 4389.
- (127) Putman, S. J.; Coulson, A. F. W.; Farley, I. R. T.; Riddleston, B.; Knowles, J. R. *Biochem. J.* **1972**, *129*, 301.
- (128) Zhu, X.; Larsen, N. A.; Basran, A.; Bruce, N. C.; Wilson, I. A. *J. Biol. Chem.* **2003**, *278*, 2008.
- (129) Zhou, G.; Denu, J. M.; Wu, L.; Dixon, J. E. *J. Biol. Chem.* **1994**, *269*, 28084.
- (130) Ji, G.; Garber, E. A. E.; Armes, L. G.; Chen, C. M.; Fuchs, J. A.; Silver, S. *Biochemistry* **1994**, *33*, 7294.
- (131) Malasarn, D.; Keefe, J. R.; Newman, D. K. *J. Bacteriol.* **2008**, *190*, 135.
- (132) Roos, G.; Buts, L.; Van Belle, K.; Brosens, E.; Geerlings, P.; Loris, R.; Wyns, L.; Messens, J. *J. Mol. Biol.* **2006**, *360*, 826.
- (133) Afkar, E.; Lisak, J.; Saltikov, C.; Basu, P.; Oremland, R. S.; Stolz, J. F. *FEMS Microbiol. Lett.* **2003**, *226*, 107.
- (134) Newman, D. K.; Ahmann, D.; Morel, F. M. M. *Geomicrobiol. J.* **1998**, *15*, 255.
- (135) Krafft, T.; Macy, J. M. *Euro. J. Biochem.* **1998**, *255*, 647.
- (136) Joshi, D. N.; Patel, J. S.; Flora, S. J. S.; Kalia, K. *Environ. Health Prev. Med.* **2008**, *13*, 257.
- (137) Mutenda, E. K.; Sparkes, M. J.; Dixon, H. B. *Biochem. J.* **1995**, *310*, 983.
- (138) Moore, S. A.; Moennich, D. M.; Gresser, M. J. *J. Biol. Chem.* **1983**, *258*, 6266.

- (139) Radabaugh, T. R.; Sampayo-Reyes, A.; Zakharyan, R. A.; Aposhian, H. V. *Chem. Res. Toxicol.* **2002**, *15*, 692.
- (140) Nidetzky, B.; Eis, C.; Albert, M. *Biochem. J.* **2000**, *351*, 649.
- (141) Cha, S.; Parks, R. *J. Biol. Chem.* **1964**, *239*, 1968.
- (142) Li, R.; Haile, J. D.; Kennelly, P. J. *J. Bacteriol.* **2003**, *185*, 6780.
- (143) Kish, M. M.; Viola, R. E. *Inorg. Chem.* **1999**, *38*, 818.
- (144) De Verdier, C. H.; Gould, B. J. *Biochim. Biophys. Acta* **1963**, *68*, 333.
- (145) Visedo-Gonzalez, E.; Dixon, H. B. *Biochem. J.* **1989**, *260*, 299.
- (146) Helmreich, E.; Cori, C. F. *Proc. Natl. Acad. Sci. U. S. A.* **1964**, *52*, 647.
- (147) Simon, J. P.; Stalon, V. *Euro. J. Biochem.* **1977**, *75*, 571.
- (148) Simons, S. S.; Chakraborti, P. K.; Cavanaugh, A. H. *J. Biol. Chem.* **1990**, *265*, 1938.
- (149) Eis, C.; Nidetzky, B. *Biochem. J.* **2002**, *363*, 335.
- (150) Adams, S. R.; Sparkes, M. J.; Dixon, H. B. *Biochem. J.* **1983**, *213*, 211.
- (151) Chawla, S.; Dixon, H. B. F. *J. Enzyme Inhib. Med. Chem.* **1995**, *8*, 255.
- (152) Duan, G. L.; Zhou, Y.; Tong, Y. P.; Mukhopadhyay, R.; Rosen, B. P.; Zhu, Y. G. *New Phytol.* **2007**, *174*, 311.
- (153) Adams, S. R.; Sparkes, M. J.; Dixon, H. B. *Biochem. J.* **1984**, *221*, 829.
- (154) Shi, J.; Mukhopadhyay, R.; Rosen, B. P. *FEMS Microbiol. Lett.* **2003**, *227*, 295.
- (155) Zakharyan, R. A.; Sampayo-Reyes, A.; Healy, S. M.; Tsaprailis, G.; Board, P. G.; Liebler, D. C.; Aposhian, H. V. *Chem. Res. Toxicol.* **2001**, *14*, 1051.
- (156) Ellis, D. R.; Gumaelius, L.; Indriolo, E.; Pickering, I. J.; Banks, J. A.; Salt, D. E. *Plant Physiol.* **2006**, *141*, 1544.
- (157) Zakharyan, R. A.; Tsaprailis, G.; Chowdhury, U. K.; Hernandez, A.; Aposhian, H. V. *Chem. Res. Toxicol.* **2005**, *18*, 1287.
- (158) Mukhopadhyay, R.; Shi, J.; Rosen, B. P. *J. Biol. Chem.* **2000**, *275*, 21149.
- (159) Sampayo-Reyes, A.; Zakharyan, R. A. *Acta Biochim. Pol.* **2006**, *53*, 547.
- (160) Van Engelenburg, S. B.; Nahreini, T.; Palmer, A. E. *ChemBioChem* **2010**, *11*, 489.
- (161) Ying, L.-Q.; Branchaud, B. P. *Bioconjugate Chem.* **2010**, *22*, 987.
- (162) Li, S.; Rosen, B. P.; Borges-Walmsley, M. I. Walmsley, A. R. *J. Biol. Chem.* **2002**, *277*, 25992.
- (163) Yang, J.; Rawat, S.; Stemmler, T. L.; Rosen, B. P. *Biochemistry* **2010**, *49*, 3658.
- (164) Lam, W.-C.; Tsao, D. H. H.; Maki, A. H. Maegley, K. A.; Reich, N. O. *Biochemistry* **1992**, *31*, 10438.
- (165) Xiang, J.; Jung, J.; Sampson, N. S. *Biochemistry* **2004**, *43*, 11436.
- (166) Goodman, J. L.; Fried, D. B.; Schepartz, A. *ChemBioChem* **2009**, *10*, 1644.
- (167) Krishnan, B.; Gierasch, L. M. *Chem. Biol.* **2008**, *15*, 1104.
- (168) Marapakala, K.; Qin, J.; Rosen, B. P. *Biochemistry* **2012**, *51*, 944.

**Table S4.** Binding affinity between arsenicals and peptides/small thiols

| <b>Arsenical</b>                   | <b>Peptide/Small thiol</b>                                                       | <b><math>K_d</math> (<math>\mu</math>M)</b> | <b>Method</b>                   | <b>Reference</b>            |
|------------------------------------|----------------------------------------------------------------------------------|---------------------------------------------|---------------------------------|-----------------------------|
| $^{73}\text{As}$ -labeled arsenite | Arsenic(+3)methyltransferase<br>YYGCGLVIPEHLENCWILDLGSGSGRDCYVLK                 | 2                                           | Vacuum filtration binding assay | Kitchin et al. <sup>1</sup> |
| $^{73}\text{As}$ -labeled arsenite | Thioredoxin reductase ASILQAGCCEGGK                                              | 12.5                                        | Vacuum filtration binding assay | Kitchin et al. <sup>1</sup> |
| $^{73}\text{As}$ -labeled arsenite | Keap-1 KYDCEQRRFYVQALLRAVRCHSLTNFLQ<br>MQLQKCEILQSDSRCKDY                        | 2.6                                         | Vacuum filtration binding assay | Kitchin et al. <sup>1</sup> |
| $^{73}\text{As}$ -labeled arsenite | $\beta$ domain of human metallothionein II<br>MDPNCSCAAGDSCTCCGSCCKCKECKCTSCKKSK | 3.1                                         | Vacuum filtration binding assay | Kitchin et al. <sup>1</sup> |
| $^{73}\text{As}$ -labeled arsenite | RYCAVCNDYASGYHYGV                                                                | 2.71                                        | Vacuum filtration binding assay | Kitchin et al. <sup>2</sup> |
| $^{73}\text{As}$ -labeled arsenite | RYCAVCNDYASGYHYGVWSCEGCKA                                                        | 2.2                                         | Vacuum filtration binding assay | Kitchin et al. <sup>2</sup> |
| $^{73}\text{As}$ -labeled arsenite | RYCAVCNDYASGYHYGVWSCEGGKA                                                        | 4.28                                        | Vacuum filtration binding assay | Kitchin et al. <sup>2</sup> |
| $^{73}\text{As}$ -labeled arsenite | RVCAVGNDYASGYHYGV                                                                | 190                                         | Vacuum filtration binding assay | Kitchin et al. <sup>2</sup> |
| $^{73}\text{As}$ -labeled arsenite | RYGAVGNDYASGYHYGV                                                                | >9600                                       | Vacuum filtration binding assay | Kitchin et al. <sup>2</sup> |
| $^{73}\text{As}$ -labeled arsenite | LEGAWQGKGVEGTEHLYSCKCKNV                                                         | 3.27                                        | Vacuum filtration binding assay | Kitchin et al. <sup>3</sup> |

|                                   |                                            |       |                                  |                              |
|-----------------------------------|--------------------------------------------|-------|----------------------------------|------------------------------|
| <sup>73</sup> As-labeled arsenite | LEGAWQGKGVEGTECLYSMKCKNV                   | 5.63  | Vacuum filtration binding assay  | Kitchin et al. <sup>3</sup>  |
| <sup>73</sup> As-labeled arsenite | LEGAWQGKGVCSTEHLYSMKCKNV                   | 20.1  | Vacuum filtration binding assay  | Kitchin et al. <sup>3</sup>  |
| <sup>73</sup> As-labeled arsenite | LEGAWCGKGVEGTEHLYSMKCKNV                   | 9.06  | Vacuum filtration binding assay  | Kitchin et al. <sup>3</sup>  |
| <sup>73</sup> As-labeled arsenite | LECAWQGKGVEGTEHLYSMKCKNV                   | 123   | Vacuum filtration binding assay  | Kitchin et al. <sup>3</sup>  |
| <sup>73</sup> As-labeled arsenite | LEGAWQGKGVEGTEHLYSMKCKNV                   | 124   | Vacuum filtration binding assay  | Kitchin et al. <sup>3</sup>  |
| <sup>73</sup> As-labeled arsenite | LECAWQGKCVEGTEHLYSMKCKNV                   | 1.3   | Vacuum filtration binding assay  | Kitchin et al. <sup>2</sup>  |
| <sup>73</sup> As-labeled arsenite | LEGAWQGKGVEGTEHLYSMKGKNV                   | >9600 | Vacuum filtration binding assay  | Kitchin et al. <sup>2</sup>  |
| Arsenite                          | Glucocorticoid receptor DNA binding domain | 2.5   | Isothermal titration calorimetry | Spunches et al. <sup>4</sup> |
| MMA <sup>III</sup>                | Glucocorticoid receptor DNA binding domain | 0.625 | Isothermal titration calorimetry | Spunches et al. <sup>4</sup> |
| PSAO                              | Ac-YGGKAAAANKAAAACCA-NH <sub>2</sub>       | 0.074 | UV absorbance at 300 nm          | Cline et al. <sup>5</sup>    |
| PSAO                              | Ac-YGGKAAAANKAAAACACA-NH <sub>2</sub>      | 0.03  | UV absorbance at 300 nm          | Cline et al. <sup>5</sup>    |
| PSAO                              | Ac-YGGKAAAANKAAACKACAA-NH <sub>2</sub>     | 0.05  | UV absorbance at 300 nm          | Cline et al. <sup>5</sup>    |
| PSAO                              | Ac-YGGKAAAANKAAACKAACA-NH <sub>2</sub>     | 0.198 | UV absorbance at 300 nm          | Cline et al. <sup>5</sup>    |
| PSAO                              | Ac-YGGKAAAANKACAKAAAA-NH <sub>2</sub>      | 0.13  | UV absorbance at 300 nm          | Cline et al. <sup>5</sup>    |
| PSAO                              | Ac-YGGKAAAANKACAKAAAA-NH <sub>2</sub>      | 0.015 | UV absorbance at 300 nm          | Cline et al. <sup>5</sup>    |

|                    |                                                                                             |                |                                   |                               |
|--------------------|---------------------------------------------------------------------------------------------|----------------|-----------------------------------|-------------------------------|
| PSAO               | Ac-YGGKAAACKACAACAAAA-NH2                                                                   | 0.088          | UV absorbance at 300 nm           | Cline et al. <sup>5</sup>     |
| PSAO               | Ac-YGGKAAACKAACAKAAAA-NH2                                                                   | 0.028          | UV absorbance at 300 nm           | Cline et al. <sup>5</sup>     |
| PSAO               | TCTTRYVEVDPGOKILQTTCT-NH2                                                                   | 0.032          | UV absorbance at 300 nm           | Ramadan et al. <sup>6</sup>   |
| PSAO               | TTCTRYVEVDPGOKILQCTTT-NH2                                                                   | 0.013          | UV absorbance at 300 nm           | Ramadan et al. <sup>6</sup>   |
| PSAO               | TCTTRYVEVDPGOKILCTTTT-NH2                                                                   | 0.052          | UV absorbance at 300 nm           | Ramadan et al. <sup>6</sup>   |
| PSAO               | TTTCRYCEVDPGOKILQTTTT-NH2                                                                   | 0.106          | UV absorbance at 300 nm           | Ramadan et al. <sup>6</sup>   |
| MMA <sup>III</sup> | XPA zinc finger<br>acetyl-DYVICEECGKEFMDSYLMNHFDLPTCDNC<br>RDADDKHK-amide (zinc-associated) | 33             | ESI-MS                            | Piatek et al. <sup>7</sup>    |
| Arsenite           | HIV nucleocapsid NCp7 zinc finger<br>KGCWKCGKEGHQMKDCTE (zinc-associated)                   | 0.48–2.3<br>mM | ESI-MS                            | Demicheli et al. <sup>8</sup> |
| Arsenite           | Sp1-zf2 (f565–595)<br>RPFMCTWSYCGKRFRSDELQRHKRTHHTGEK                                       | 235            | Intrinsic tryptophan fluorescence | Zhao et al. <sup>9</sup>      |
| Arsenite           | NCp7-zf2 (f34–52)<br>KGCWKCGKEGHQMKDCTER                                                    | 3.3            | Intrinsic tryptophan fluorescence | Zhao et al. <sup>9</sup>      |
| Arsenite           | ER $\alpha$ -zf1 (f180–214)<br>KETRYCAVCNDYASGYHYGVWSCEGCKAFFKR<br>SIQ                      | 2.4            | Intrinsic tryptophan fluorescence | Zhao et al. <sup>9</sup>      |
| Arsenite           | Sp1 f530–623                                                                                | 5.8            | Intrinsic tryptophan fluorescence | Zhao et al. <sup>9</sup>      |
| Arsenite           | NCp7 f12–55                                                                                 | 4.4            | Intrinsic tryptophan fluorescence | Zhao et al. <sup>9</sup>      |

|          |                                       |          |                                         |                              |
|----------|---------------------------------------|----------|-----------------------------------------|------------------------------|
| Arsenite | ER $\alpha$ fl80–241                  | 3.6      | Intrinsic tryptophan fluorescence       | Zhao et al. <sup>9</sup>     |
| FlAsH    | Ac–WDCCCCCK–NH <sub>2</sub>           | 1800 pM  | Fluorescence intensity at 530 nm        | Adams et al. <sup>10</sup>   |
| FlAsH    | Ac–WDCCACCK–NH <sub>2</sub>           | 67 pM    | Fluorescence intensity at 530 nm        | Adams et al. <sup>10</sup>   |
| FlAsH    | Ac–WDCCGCCCK–NH <sub>2</sub>          | 100 pM   | Fluorescence intensity at 530 nm        | Adams et al. <sup>10</sup>   |
| FlAsH    | Ac–WDCCPCCCK–NH <sub>2</sub>          | 150 pM   | Fluorescence intensity at 530 nm        | Adams et al. <sup>10</sup>   |
| FlAsH    | Ac–WEAAAREACCRECCARA–NH <sub>2</sub>  | 70 pM    | Fluorescence intensity at 530 nm        | Adams et al. <sup>10</sup>   |
| FlAsH    | Ac–WDCCAECCK–NH <sub>2</sub>          | 72 pM    | Fluorescence intensity at 530 nm        | Adams et al. <sup>10</sup>   |
| FlAsH    | Ac–WDCCSECCK–NH <sub>2</sub>          | 42 pM    | Fluorescence intensity at 530 nm        | Adams et al. <sup>10</sup>   |
| FlAsH    | Ac–WDCCDECCK–NH <sub>2</sub>          | 41 pM    | Fluorescence intensity at 530 nm        | Adams et al. <sup>10</sup>   |
| FlAsH    | Ac–WDCCPGCCK–NH <sub>2</sub>          | 4 pM     | Fluorescence intensity at 530 nm        | Adams et al. <sup>10</sup>   |
| FlAsH    | Ac–WDCCGPCCK–NH <sub>2</sub>          | 72 pM    | Fluorescence intensity at 530 nm        | Adams et al. <sup>10</sup>   |
| FlAsH    | Ac–WDCCDEACCK–NH <sub>2</sub>         | 92000 pM | Fluorescence intensity at 530 nm        | Adams et al. <sup>10</sup>   |
| CrAsH    | Ac–AREACCPGCCK–NH <sub>2</sub>        | 407 nM   | Fluorescence intensity at around 530 nm | Cao et al. <sup>11</sup>     |
| ReAsH    | Ac–AREACCPGCCK–NH <sub>2</sub>        | 1.3      | Fluorescence intensity at 608 nm        | Chen et al. <sup>12</sup>    |
| ReAsH    | Ac–AREACCKACCK–NH <sub>2</sub>        | 3.3      | Fluorescence intensity at 608 nm        | Chen et al. <sup>12</sup>    |
| FlAsH    | Ac–AREACCPGCCK–NH <sub>2</sub>        | 0.24     | Fluorescence intensity at 530 nm        | Chen et al. <sup>12</sup>    |
| FlAsH    | Ac–AREACCKACCK–NH <sub>2</sub>        | 0.85     | Fluorescence intensity at 530 nm        | Chen et al. <sup>12</sup>    |
| AsCy3    | Ac–CCKAEAACC–NH <sub>2</sub>          | 80 nM    | Fluorescence intensity at 568 nm        | Cao et al. <sup>13</sup>     |
| FlAsH    | Ac–FLNCCPGCCMEP–NH <sub>2</sub>       | 0.48     | Fluorescence intensity at 530 nm        | Luedtke et al. <sup>14</sup> |
| FlAsH    | Ac–FLNCCPPPPPPPPCCMEP–NH <sub>2</sub> | >111     | Fluorescence intensity at 530 nm        | Luedtke et al. <sup>14</sup> |

|       |                                                     |      |                                  |                              |
|-------|-----------------------------------------------------|------|----------------------------------|------------------------------|
| FIAsH | Ac-FLNCCPSQPTYPGDDAPVEDLIRFYDNLQQY<br>LNVCCMEP-NH2  | 5.8  | Fluorescence intensity at 530 nm | Luedtke et al. <sup>14</sup> |
| FIAsH | Ac-FLNCCEWTWDDATKTWTWTCCMEP-NH2                     | 0.62 | Fluorescence intensity at 530 nm | Luedtke et al. <sup>14</sup> |
| FIAsH | Ac-CCGGQLEDKVEELLSKNYHLENEVARLKKL<br>VG-NH2         | 25   | Fluorescence intensity at 530 nm | Luedtke et al. <sup>14</sup> |
| FIAsH | Ac-WRIARLEEKVKTLKAQNSELASTANMLREQ<br>VAQLKQKVCC-NH2 | 1.8  | Fluorescence intensity at 530 nm | Luedtke et al. <sup>14</sup> |
| ReAsH | Ac-FLNCCPGCCMEP-NH2                                 | 0.37 | Fluorescence intensity at 630 nm | Luedtke et al. <sup>14</sup> |
| ReAsH | Ac-FLNCCPPPPPPPPCCMEP-NH2                           | >111 | Fluorescence intensity at 630 nm | Luedtke et al. <sup>14</sup> |
| ReAsH | Ac-FLNCCPSQPTYPGDDAPVEDLIRFYDNLQQY<br>LNVCCMEP-NH2  | 3.4  | Fluorescence intensity at 630 nm | Luedtke et al. <sup>14</sup> |
| ReAsH | Ac-FLNCCEWTWDDATKTWTWTCCMEP-NH2                     | 0.38 | Fluorescence intensity at 630 nm | Luedtke et al. <sup>14</sup> |
| ReAsH | Ac-CCGGQLEDKVEELLSKNYHLENEVARLKKL<br>VG-NH2         | 28   | Fluorescence intensity at 630 nm | Luedtke et al. <sup>14</sup> |
| ReAsH | Ac-WRIARLEEKVKTLKAQNSELASTANMLREQ<br>VAQLKQKVCC-NH2 | 10   | Fluorescence intensity at 630 nm | Luedtke et al. <sup>14</sup> |

|                    |                                    |         |                                         |                               |
|--------------------|------------------------------------|---------|-----------------------------------------|-------------------------------|
| GSAO               | Protein disulfide isomerase WCGHCK | 0.87    | Remaining RSH content assayed with DTNB | Donoghue et al. <sup>15</sup> |
| GSAO               | Thioredoxin WCGPCK                 | 1.42    | Remaining RSH content assayed with DTNB | Donoghue et al. <sup>15</sup> |
| GSAO               | 2,3-dimercapto-1-propanol (BAL)    | 0.13    | Remaining RSH content assayed with DTNB | Donoghue et al. <sup>15</sup> |
| GSAO               | 6,8-thioctic acid (DHLA)           | 0.2     | Remaining RSH content assayed with DTNB | Donoghue et al. <sup>15</sup> |
| GSAO               | Dithiothreitol (DTT)               | 0.42    | Remaining RSH content assayed with DTNB | Donoghue et al. <sup>15</sup> |
| Arsenite           | Glutathione                        | 0.556   | Isothermal titration calorimetry        | Spuches et al. <sup>16</sup>  |
| MMA <sup>III</sup> | Glutathione                        | 0.077   | Isothermal titration calorimetry        | Spuches et al. <sup>16</sup>  |
| Arsenite           | 2,3-dimercaptosuccinic acid (DMSA) | 1.2 nM  | Isothermal titration calorimetry        | Spuches et al. <sup>16</sup>  |
| MMA <sup>III</sup> | 2,3-dimercaptosuccinic acid (DMSA) | 0.1     | Isothermal titration calorimetry        | Spuches et al. <sup>16</sup>  |
| Arsenite           | 6,8-thioctic acid (DHLA)           | 0.25 aM | UV absorbance at 270 nm                 | Spuches et al. <sup>16</sup>  |
| MMA <sup>III</sup> | 6,8-thioctic acid (DHLA)           | 0.091   | Isothermal titration calorimetry        | Spuches et al. <sup>16</sup>  |
| Arsenite           | Dithiothreitol (DTT)               | 1.05    | Isothermal titration calorimetry        | Spuches et al. <sup>16</sup>  |

|                                      |                                |              |                                                                                 |                               |
|--------------------------------------|--------------------------------|--------------|---------------------------------------------------------------------------------|-------------------------------|
| MMA <sup>III</sup>                   | Dithiothreitol (DTT)           | 1.21         | Isothermal titration calorimetry                                                | Spuches et al. <sup>16</sup>  |
| Arsenite                             | Dithiothreitol (DTT)           | 0.33         | Remaining RSH content assayed with DTNB                                         | Zahler et al. <sup>17</sup>   |
| Arsenite                             | Dithioerythritol (DTE)         | 0.37         | Remaining RSH content assayed with DTNB                                         | Zahler et al. <sup>17</sup>   |
| Arsenite                             | 1,3-dithioglycerol             | 0.49         | Remaining RSH content assayed with DTNB                                         | Zahler et al. <sup>17</sup>   |
| Arsenite                             | 1,2-dithioglycerol (BAL)       | 0.26         | Remaining RSH content assayed with DTNB                                         | Zahler et al. <sup>17</sup>   |
| APA                                  | Dithiothreitol (DTT)           | 2.2          | Remaining RSH content assayed with DTNB                                         | Dou et al. <sup>18</sup>      |
| <sup>14</sup> C-phenyldichloroarsine | Glutathione                    | 0.27 nM      | Equilibrium dialysis of <sup>14</sup> C-As binding in intact human erythrocytes | Chong et al. <sup>19</sup>    |
| PAO                                  | Glutathione                    | 0.1 – 0.5 nM | ESI-MS                                                                          | Schmidt et al. <sup>20</sup>  |
| Melarsen oxide                       | Dihydrotrypanothione           | 0.083        | Remaining RSH content assayed with DTNB                                         | Fairlamb et al. <sup>21</sup> |
| Melarsen oxide                       | 2,3-dimercaptopropanol(BAL)    | 12.6 pM      | Remaining RSH content assayed with DTNB                                         | Fairlamb et al. <sup>21</sup> |
| Melarsen oxide                       | 2,3-dimercaptosuccinate (DMSA) | 22.2 pM      | Remaining RSH content assayed with DTNB                                         | Fairlamb et al. <sup>21</sup> |
| Melarsen oxide                       | Dihydrolipoic acid (DHLA)      | 0.22 nM      | Remaining RSH content assayed with DTNB                                         | Fairlamb et al. <sup>21</sup> |
| Melarsen oxide                       | Dihydrolipoamide               | 0.18 nM      | Remaining RSH content assayed with DTNB                                         | Fairlamb et al. <sup>21</sup> |

N.B. Mutated protein domains, as investigated in ref [14], are not included in the table.

## References

- (1) Kitchin, K. T.; Wallace, K. *J. Inorg. Biochem.* **2008**, *102*, 532.
- (2) Kitchin, K. T.; Wallace, K. *Toxicol. Appl. Pharmacol.* **2005**, *206*, 66.
- (3) Kitchin, K. T.; Wallace, K. *J. Biochem. Mol. Toxicol.* **2006**, *20*, 35.
- (4) Spuches, A. M.; Wilcox, D. E. *J. Am. Chem. Soc.* **2008**, *130*, 8148.
- (5) Cline, D. J.; Thorpe, C.; Schneider, J. P. *J. Am. Chem. Soc.* **2003**, *125*, 2923.
- (6) Ramadan, D.; Cline, D. J.; Bai, S.; Thorpe, C.; Schneider, J. P. *J. Am. Chem. Soc.* **2007**, *129*, 2981.
- (7) Piątek, K.; Schwerdtle, T.; Hartwig, A.; Bal, W. *Chem. Res. Toxicol.* **2008**, *21*, 600.
- (8) Demicheli, C.; Frézard, F.; Pereira, F. A.; Santos, D. M.; Mangrum, J. B.; Farrell, N. P. *J. Inorg. Biochem.* **2011**, *105*, 1753.
- (9) Zhao, L.; Chen, S.; Jia, L.; Shu, S.; Zhu, P.; Liu, Y. *Metallomics* **2012**, *4*, 988.
- (10) Adams, S. R.; Campbell, R. E.; Gross, L. A.; Martin, B. R.; Walkup, G. K.; Yao, Y.; Llopis, J.; Tsien, R. Y. *J. Am. Chem. Soc.* **2002**, *124*, 6063.
- (11) Cao, H.; Chen, B.; Squier, T. C.; Mayer, M. U. *Chem. Commun.* **2006**, 2006, 2601.
- (12) Chen, B.; Cao, H.; Yan, P.; Mayer, M. U.; Squier, T. C. *Bioconjug. Chem.* **2007**, *18*, 1259.
- (13) Cao, H.; Xiong, Y.; Wang, T.; Chen, B.; Squier, T. C.; Mayer, M. U. *J. Am. Chem. Soc.* **2007**, *129*, 8672.
- (14) Luedtke, N. W.; Dexter, R. J.; Fried, D. B.; Schepartz, A. *Nat. Chem. Biol.* **2007**, *3*, 779.
- (15) Donoghue, N.; Yam, P. T. W.; Jiang, X. M.; Hogg, P. J. *Protein Sci.* **2000**, *9*, 2436.
- (16) Spuches, A. M.; Kruszyna, H. G.; Rich, A. M.; Wilcox, D. E. *Inorg. Chem.* **2005**, *44*, 2964.
- (17) Zahler, W. L.; Cleland, W. W. *J. Biol. Chem.* **1968**, *243*, 716.
- (18) Dou, Y. M.; McHugh, T.; Lane, W. V.; Rossant, C. J.; Loring, R. H. *J. Biol. Chem.* **1994**, *269*, 20410.
- (19) Chong, S.; Dill, K.; McGown, E. *J. Biochem. Toxicol.* **1989**, *4*, 39.
- (20) Schmidt, A. C.; Neustadt, M.; Otto, M. *J. Mass Spectrom.* **2007**, *42*, 771.
- (21) Fairlamb, A. H.; Cerami, A. *Annu. Rev. Microbiol.* **1992**, *46*, 695.

**Table S5.** Rate constants of the binding between arsenicals and proteins/peptides/small thiols

| Arsenical          | Protein/Peptide/Small thiol            | $k_{\text{on}}$ ( $\text{M}^{-1}\text{s}^{-1}$ ) | $k_{\text{off}}$ ( $\text{s}^{-1}$ ) | Method                                                                                                                            | Reference                           |
|--------------------|----------------------------------------|--------------------------------------------------|--------------------------------------|-----------------------------------------------------------------------------------------------------------------------------------|-------------------------------------|
| Arsenite           | Oxidized xanthine oxidase              | 0.9                                              | $2 \times 10^{-5}$                   | Charge-transfer complex absorbance at 380 nm (cyanolysis of inactivated enzyme)                                                   | Hille et al. <sup>1</sup>           |
| Arsenite           | Oxidized xanthine oxidase              | $2.9 \times 10^3$                                | $2 \times 10^{-5}$                   | Charge-transfer complex absorbance at 380 nm (cyanolysis of inactivated enzyme)                                                   | Stewart et al. <sup>2</sup>         |
| Arsenite           | Reduced xanthine oxidase               | $\sim 100$                                       | $0.6 \times 10^{-5}$ (calculated)    | Enzyme activity of uric acid formation measured at 295 nm                                                                         | Stewart et al. <sup>2</sup>         |
| Arsenite           | Oxidized desulfo xanthine oxidase      | <u>0.005</u>                                     | $1 \times 10^{-5}$                   | Recovery of enzyme activity with dilution or charge-transfer complex absorbance at 380 nm with cyanolysis after removing arsenite | Stewart et al. <sup>2</sup>         |
| Arsenite           | Reduced xanthine oxidase               | 98                                               |                                      | Enzyme activity of uric acid formation measured at 295 nm                                                                         | George et al. <sup>3</sup>          |
| Arsenite           | Oxidized xanthine oxidase              | 2.38                                             |                                      | Charge-transfer complex absorbance at 380 nm                                                                                      | George et al. <sup>3</sup>          |
| PAO                | LMW phosphotyrosyl protein phosphatase | 14                                               |                                      | Enzyme activity for <i>p</i> -nitrophenol at 410 nm                                                                               | Zhang et al. <sup>4</sup>           |
| Arsenite–BAL       | Betaine aldehyde dehydrogenase         | 26                                               | $3.3 \times 10^{-3}$                 | Enzyme activity of NADPH formation at 340 nm (recovery of enzyme activity with DTT or $\beta$ -ME)                                | Gonzalez–Segura et al. <sup>5</sup> |
| Arsenite           | Acetylcholinesterase from electric eel | 2.2                                              | $3.2 \times 10^{-5}$ (calculated)    | Enzyme activity of hydrolysis of acetylthiocholine at 412 nm                                                                      | Wilson et al. <sup>6</sup>          |
| Arsenite           | Butyrylcholinesterase from human serum | 5.7                                              | $7.3 \times 10^{-4}$                 | Enzyme activity of hydrolysis of acetylthiocholine at 412 nm (recovery of inactivated enzyme with extensive dilution)             | Page et al. <sup>7</sup>            |
| Arsenite           | Butyrylcholinesterase from horse serum | 1.2                                              |                                      | Flow microcalorimetry                                                                                                             | Fulladosa et al. <sup>8</sup>       |
| MMA <sup>III</sup> | Reduced riboflavin binding protein     | 2350                                             |                                      | Stopped-flow fluorescence at 295 nm                                                                                               | Ramadan et al. <sup>9</sup>         |
| PAO                | Lipoamide dehydrogenase                | 9                                                |                                      | Enzyme activity of NADH oxidation at 340 nm                                                                                       | Knowles <sup>10</sup>               |
| MMA <sup>III</sup> | Lipoamide dehydrogenase                | 94                                               |                                      | Enzyme activity of NADH oxidation at 340 nm                                                                                       | Knowles <sup>10</sup>               |

|          |                                                            |                                                                                                                                                                                                                                                                                                                                                  |                                                                                                                                                                                                                                              |                          |
|----------|------------------------------------------------------------|--------------------------------------------------------------------------------------------------------------------------------------------------------------------------------------------------------------------------------------------------------------------------------------------------------------------------------------------------|----------------------------------------------------------------------------------------------------------------------------------------------------------------------------------------------------------------------------------------------|--------------------------|
| Arsenite | apo-human metallothionein                                  | $k_{1\beta\alpha} = 25$<br>$k_{2\beta\alpha} = 24$<br>$k_{3\beta\alpha} = 19$<br>$k_{4\beta\alpha} = 14$<br>$k_{5\beta\alpha} = 8.7$<br>$k_{6\beta\alpha} = 3.7$                                                                                                                                                                                 | Time-resolved ESI-MS<br>Time-resolved ESI-MS<br>Time-resolved ESI-MS<br>Time-resolved ESI-MS<br>Time-resolved ESI-MS<br>Time-resolved ESI-MS                                                                                                 | Ngu et al. <sup>11</sup> |
| Arsenite | apo-human metallothionein $\alpha$ domain                  | $k_{1\alpha} = 5.5$<br>$k_{2\alpha} = 6.3$<br>$k_{3\alpha} = 3.9$                                                                                                                                                                                                                                                                                | Time-resolved ESI-MS<br>Time-resolved ESI-MS<br>Time-resolved ESI-MS                                                                                                                                                                         | Ngu et al. <sup>12</sup> |
| Arsenite | apo-human metallothionein $\beta$ domain                   | $k_{1\beta} = 3.6$<br>$k_{2\beta} = 2.0$<br>$k_{3\beta} = 0.8$                                                                                                                                                                                                                                                                                   | Time-resolved ESI-MS<br>Time-resolved ESI-MS<br>Time-resolved ESI-MS                                                                                                                                                                         | Ngu et al. <sup>12</sup> |
| Arsenite | apo-F.vesiculosus metallothionein                          | $k_{1\gamma} = 19.8$<br>$k_{2\gamma} = 1.4$<br>$k_{1\beta} = 16.3$<br>$k_{2\beta} = 9.1$<br>$k_{3\beta} = 2.2$                                                                                                                                                                                                                                   | Time-resolved ESI-MS<br>Time-resolved ESI-MS<br>Time-resolved ESI-MS<br>Time-resolved ESI-MS<br>Time-resolved ESI-MS                                                                                                                         | Ngu et al. <sup>13</sup> |
| Arsenite | concatenated human metallothionein triple $\alpha$ domains | $k_{1\alpha\alpha\alpha} = 52$<br>$k_{2\alpha\alpha\alpha} = 45$<br>$k_{3\alpha\alpha\alpha} = 46$<br>$k_{4\alpha\alpha\alpha} = 42$<br>$k_{5\alpha\alpha\alpha} = 38$<br>$k_{6\alpha\alpha\alpha} = 36$<br>$k_{7\alpha\alpha\alpha} = 29$<br>$k_{8\alpha\alpha\alpha} = 25$<br>$k_{9\alpha\alpha\alpha} = 14$<br>$k_{10\alpha\alpha\alpha} = 6$ | Time-resolved ESI-MS<br>Time-resolved ESI-MS<br>Time-resolved ESI-MS<br>Time-resolved ESI-MS<br>Time-resolved ESI-MS<br>Time-resolved ESI-MS<br>Time-resolved ESI-MS<br>Time-resolved ESI-MS<br>Time-resolved ESI-MS<br>Time-resolved ESI-MS | Ngu et al. <sup>14</sup> |

|          |                                                           |                                                                                                                                                                                                                                                                                   |                                        |                                                                                                                                                                                                                      |                              |
|----------|-----------------------------------------------------------|-----------------------------------------------------------------------------------------------------------------------------------------------------------------------------------------------------------------------------------------------------------------------------------|----------------------------------------|----------------------------------------------------------------------------------------------------------------------------------------------------------------------------------------------------------------------|------------------------------|
| Arsenite | concatenated human metallothionein triple $\beta$ domains | $k_{1\beta\beta\beta} = 40$<br>$k_{2\beta\beta\beta} = 36$<br>$k_{3\beta\beta\beta} = 37$<br>$k_{4\beta\beta\beta} = 26$<br>$k_{5\beta\beta\beta} = 27$<br>$k_{6\beta\beta\beta} = 17$<br>$k_{7\beta\beta\beta} = 12$<br>$k_{8\beta\beta\beta} = 6$<br>$k_{9\beta\beta\beta} = 1$ |                                        | Time-resolved ESI-MS<br>Time-resolved ESI-MS<br>Time-resolved ESI-MS<br>Time-resolved ESI-MS<br>Time-resolved ESI-MS<br>Time-resolved ESI-MS<br>Time-resolved ESI-MS<br>Time-resolved ESI-MS<br>Time-resolved ESI-MS | Ngu et al. <sup>14</sup>     |
| PSAO     | Ac-YGGKAAAAKAAAAK<br>ACCA-NH2                             | 14430                                                                                                                                                                                                                                                                             | <u><math>1.1 \times 10^{-3}</math></u> | Stopped-flow absorbance at 300 nm                                                                                                                                                                                    | Cline et al. <sup>15</sup>   |
| PSAO     | Ac-YGGKAAAAKAAAAK<br>CACA-NH2                             | 10970                                                                                                                                                                                                                                                                             | <u><math>3.3 \times 10^{-4}</math></u> | Stopped-flow absorbance at 300 nm                                                                                                                                                                                    | Cline et al. <sup>15</sup>   |
| PSAO     | Ac-YGGKAAAAKAAACK<br>ACAA-NH2                             | 14250                                                                                                                                                                                                                                                                             | <u><math>7.1 \times 10^{-4}</math></u> | Stopped-flow absorbance at 300 nm                                                                                                                                                                                    | Cline et al. <sup>15</sup>   |
| PSAO     | Ac-YGGKAAAAKAAACK<br>AACA-NH2                             | 14080                                                                                                                                                                                                                                                                             | <u><math>2.8 \times 10^{-3}</math></u> | Stopped-flow absorbance at 300 nm                                                                                                                                                                                    | Cline et al. <sup>15</sup>   |
| PSAO     | Ac-YGGKAAAAKACCAK<br>AAAA-NH2                             | 27670                                                                                                                                                                                                                                                                             | <u><math>3.6 \times 10^{-3}</math></u> | Stopped-flow absorbance at 300 nm                                                                                                                                                                                    | Cline et al. <sup>15</sup>   |
| PSAO     | Ac-YGGKAAAAKACCAK<br>AAAA-NH2                             | 21580                                                                                                                                                                                                                                                                             | <u><math>3.2 \times 10^{-4}</math></u> | Stopped-flow absorbance at 300 nm                                                                                                                                                                                    | Cline et al. <sup>15</sup>   |
| PSAO     | Ac-YGGKAAACKACAAC<br>AAAA-NH2                             | 23910                                                                                                                                                                                                                                                                             | <u><math>2.1 \times 10^{-3}</math></u> | Stopped-flow absorbance at 300 nm                                                                                                                                                                                    | Cline et al. <sup>15</sup>   |
| PSAO     | Ac-YGGKAAACKAACAK<br>AAAA-NH2                             | 26550                                                                                                                                                                                                                                                                             | <u><math>7.4 \times 10^{-4}</math></u> | Stopped-flow absorbance at 300 nm                                                                                                                                                                                    | Cline et al. <sup>15</sup>   |
| PSAO     | TCTTRYVEVDPGOKILQT<br>TCT-NH2                             | 16190                                                                                                                                                                                                                                                                             | <u><math>5.2 \times 10^{-4}</math></u> | Stopped-flow absorbance at 300 nm                                                                                                                                                                                    | Ramadan et al. <sup>16</sup> |
| PSAO     | TTCTRYVEVDPGOKILQC<br>TTT-NH2                             | 21680                                                                                                                                                                                                                                                                             | <u><math>2.8 \times 10^{-4}</math></u> | Stopped-flow absorbance at 300 nm                                                                                                                                                                                    | Ramadan et al. <sup>16</sup> |

|       |                               |        |                      |                                                                                    |                              |
|-------|-------------------------------|--------|----------------------|------------------------------------------------------------------------------------|------------------------------|
| PSAO  | TCTTRYVEVDPGOKILCTT<br>TT-NH2 | 10310  | $5.4 \times 10^{-4}$ | Stopped-flow absorbance at 300 nm                                                  | Ramadan et al. <sup>16</sup> |
| PSAO  | TTTCRYCEVDPGOKILQTT<br>TT-NH2 | 16440  | $1.7 \times 10^{-3}$ | Stopped-flow absorbance at 300 nm                                                  | Ramadan et al. <sup>16</sup> |
| ReAsH | Ac-AREACCPGCCCK-NH2           | 12500  | $1.6 \times 10^{-2}$ | Fluorescence intensity at 608 nm                                                   | Chen et al. <sup>17</sup>    |
| ReAsH | Ac-AREACCKACCK-NH2            | 8470   | $2.8 \times 10^{-2}$ | Fluorescence intensity at 608 nm                                                   | Chen et al. <sup>17</sup>    |
| FlAsH | Ac-AREACCPGCCCK-NH2           | 124000 | $3.0 \times 10^{-2}$ | Fluorescence intensity at 530 nm                                                   | Chen et al. <sup>17</sup>    |
| FlAsH | Ac-AREACCKACCK-NH2            | 143000 | 0.12                 | Fluorescence intensity at 530 nm                                                   | Chen et al. <sup>17</sup>    |
| FlAsH | Ac-WDCCCK-NH2                 | 46000  | $8.2 \times 10^{-5}$ | Fluorescence intensity at 530 nm (exchange of HPLC<br>purified complex with ReAsH) | Adams et al. <sup>18</sup>   |
| FlAsH | Ac-WDCCACCK-NH2               | 57000  | $3.8 \times 10^{-6}$ | Fluorescence intensity at 530 nm (exchange of HPLC<br>purified complex with ReAsH) | Adams et al. <sup>18</sup>   |
| FlAsH | Ac-WDCCGCCK-NH2               | 35000  | $3.6 \times 10^{-6}$ | Fluorescence intensity at 530 nm (exchange of HPLC<br>purified complex with ReAsH) | Adams et al. <sup>18</sup>   |
| FlAsH | Ac-WDCCPCK-NH2                | 100000 | $1.5 \times 10^{-5}$ | Fluorescence intensity at 530 nm (exchange of HPLC<br>purified complex with ReAsH) | Adams et al. <sup>18</sup>   |
| FlAsH | Ac-WEAAAREACCRECCA<br>RA-NH2  | 65000  | $4.5 \times 10^{-6}$ | Fluorescence intensity at 530 nm (exchange of HPLC<br>purified complex with ReAsH) | Adams et al. <sup>18</sup>   |
| FlAsH | Ac-WDCCAECCK-NH2              | 25000  | $1.8 \times 10^{-6}$ | Fluorescence intensity at 530 nm (exchange of HPLC<br>purified complex with ReAsH) | Adams et al. <sup>18</sup>   |
| FlAsH | Ac-WDCCSECCK-NH2              | 50000  | $2.1 \times 10^{-6}$ | Fluorescence intensity at 530 nm (exchange of HPLC<br>purified complex with ReAsH) | Adams et al. <sup>18</sup>   |
| FlAsH | Ac-WDCCDECCK-NH2              | 32000  | $1.3 \times 10^{-6}$ | Fluorescence intensity at 530 nm (exchange of HPLC<br>purified complex with ReAsH) | Adams et al. <sup>18</sup>   |
| FlAsH | Ac-WDCCPGCCCK-NH2             | 310000 | $1.2 \times 10^{-6}$ | Fluorescence intensity at 530 nm (exchange of HPLC<br>purified complex with ReAsH) | Adams et al. <sup>18</sup>   |
| FlAsH | Ac-WDCCGPCCK-NH2              | 50000  | $3.6 \times 10^{-6}$ | Fluorescence intensity at 530 nm (exchange of HPLC<br>purified complex with ReAsH) | Adams et al. <sup>18</sup>   |
| FlAsH | Ac-WDCCDEACCK-NH2             | 65000  | $6.0 \times 10^{-3}$ | Fluorescence intensity at 530 nm (exchange of HPLC<br>purified complex with ReAsH) | Adams et al. <sup>18</sup>   |

|                                       |                              |                                                                                              |                                                                                   |                                                                                                                                                                                                                                                                                                 |                              |
|---------------------------------------|------------------------------|----------------------------------------------------------------------------------------------|-----------------------------------------------------------------------------------|-------------------------------------------------------------------------------------------------------------------------------------------------------------------------------------------------------------------------------------------------------------------------------------------------|------------------------------|
| <sup>73</sup> As–label<br>ed arsenite | RVCAVGNDYASGYHYGV            | $k_1 = 4500$<br>(calculated)<br>$k_2 = 30.7$<br>(calculated)<br>$k_3 = 0.6$<br>(calculated)  | $k_{-1} = 0.85$<br>$k_{-2} = 5.8 \times 10^{-3}$<br>$k_{-3} = 1.2 \times 10^{-4}$ | Exchange of binding complex with cold arsenite<br>followed by vacuum filtration binding assay<br>Exchange of binding complex with cold arsenite<br>followed by vacuum filtration binding assay<br>Exchange of binding complex with cold arsenite<br>followed by vacuum filtration binding assay | Kitchin et al. <sup>19</sup> |
| <sup>73</sup> As–label<br>ed arsenite | LECAWQGKCVEGTEHLY<br>SMKCKNV | $k_1 = 2500$<br>(calculated)<br>$k_2 = 6830$<br>(calculated)<br>$k_3 = 58.3$<br>(calculated) | $k_{-1} = 0.3$<br>$k_{-2} = 8.9 \times 10^{-3}$<br>$k_{-3} = 7.5 \times 10^{-5}$  | Exchange of binding complex with cold arsenite<br>followed by vacuum filtration binding assay<br>Exchange of binding complex with cold arsenite<br>followed by vacuum filtration binding assay<br>Exchange of binding complex with cold arsenite<br>followed by vacuum filtration binding assay | Kitchin et al. <sup>19</sup> |
| Arsenite                              | Dithiothreitol (DTT)         | $4.7 \times 10^2$                                                                            | $1.5 \times 10^{-4}$                                                              | Remaining RSH content assayed with DTNB                                                                                                                                                                                                                                                         | Zahler et al. <sup>20</sup>  |
| Arsenite                              | Dithioerythritol (DTE)       | $4.5 \times 10^2$                                                                            | $1.7 \times 10^{-4}$                                                              | Remaining RSH content assayed with DTNB                                                                                                                                                                                                                                                         | Zahler et al. <sup>20</sup>  |
| Arsenite                              | 1,3–dithioglycerol           | $1.2 \times 10^3$                                                                            | $5.7 \times 10^{-4}$                                                              | Remaining RSH content assayed with DTNB                                                                                                                                                                                                                                                         | Zahler et al. <sup>20</sup>  |
| Arsenite                              | 1,2–dithioglycerol           | $3.0 \times 10^2$                                                                            | $7.7 \times 10^{-5}$                                                              | Remaining RSH content assayed with DTNB                                                                                                                                                                                                                                                         | Zahler et al. <sup>20</sup>  |

N.B. Underlined values were calculated based on reported binding affinity data. Mutated proteins as investigated in ref [21] are not included in the table.

## References

- (1) Hille, R.; Stewart, R. C.; Fee, J. A.; Massey, V. *J. Biol. Chem.* **1983**, 258, 4849.
- (2) Stewart, R. C.; Hille, R.; Massey, V. *J. Biol. Chem.* **1984**, 259, 14426.
- (3) George, G. N.; Bray, R. C. *Biochemistry* **1983**, 22, 1013.
- (4) Zhang, Z. Y.; Davis, J. P.; Van Etten, R. L. *Biochemistry* **1992**, 31, 1701.
- (5) González–Segura, L.; Mújica–Jiménez, C.; Muñoz–Clares, R. A. *Chem. Biol. Interact.* **2009**, 178, 64.
- (6) Wilson, I. B.; Silman, I. *Biochemistry* **1977**, 16, 2701.
- (7) Page, J. D.; Wilson, I. B.; Silman, I. *Mol. Pharmacol.* **1985**, 27, 437.
- (8) Fulladosa, E.; Debord, J.; Villaescusa, I.; Bollinger, J. C.; Murat, J. C. *Environ. Chem. Lett.* **2007**, 5, 115.
- (9) Ramadan, D.; Rancy, P. C.; Nagarkar, R. P.; Schneider, J. P.; Thorpe, C. *Biochemistry* **2008**, 48, 424.
- (10) Knowles, F. C. *Arch. Biochem. Biophys.* **1985**, 242, 1.

- (11) Ngu, T. T.; Easton, A.; Stillman, M. J. *J. Am. Chem. Soc.* **2008**, *130*, 17016.
- (12) Ngu, T. T.; Stillman, M. J. *J. Am. Chem. Soc.* **2006**, *128*, 12473.
- (13) Ngu, T. T.; Lee, J. A.; Rushton, M. K.; Stillman, M. J. *Biochemistry* **2009**, *48*, 8806.
- (14) Ngu, T. T.; Lee, J. A.; Pinter, T. B. J.; Stillman, M. J. *J. Inorg. Biochem.* **2010**, *104*, 232.
- (15) Cline, D. J.; Thorpe, C.; Schneider, J. P. *J. Am. Chem. Soc.* **2003**, *125*, 2923.
- (16) Ramadan, D.; Cline, D. J.; Bai, S.; Thorpe, C.; Schneider, J. P. *J. Am. Chem. Soc.* **2007**, *129*, 2981.
- (17) Chen, B.; Cao, H.; Yan, P.; Mayer, M. U.; Squier, T. C. *Bioconjug. Chem.* **2007**, *18*, 1259.
- (18) Adams, S. R.; Campbell, R. E.; Gross, L. A.; Martin, B. R.; Walkup, G. K.; Yao, Y.; Llopis, J.; Tsien, R. Y. *J. Am. Chem. Soc.* **2002**, *124*, 6063.
- (19) Kitchin, K. T.; Wallace, K. *J. Biochem. Mol. Toxicol.* **2006**, *20*, 48.
- (20) Zahler, W. L.; Cleland, W. W. *J. Biol. Chem.* **1968**, *243*, 716.
- (21) Yang, J.; Rawat, S.; Stemmler, T. L.; Rosen, B. P. *Biochemistry* **2010**, *49*, 3658.
